1 **Title:**

2 Regional and LTP-Dependent Variation of Synaptic Information Storage Capacity  
3 in Rat Hippocampus

4  
5  
6  
7 **Authors:**

8 **Mohammad Samavat<sup>1,2\*</sup>, Thomas M. Bartol<sup>2</sup>, Cailey Bromer<sup>2</sup>, Jared B. Bowden<sup>4</sup>,**  
9 **Dusten D. Hubbard<sup>4</sup>, Dakota C. Hanka<sup>4</sup>, Masaaki Kuwajima<sup>4</sup>, John M.**  
10 **Mendenhall<sup>4</sup>, Patrick H. Parker<sup>4</sup>, Wickliffe C. Abraham<sup>6\*</sup>, Kristen M. Harris<sup>4,5\*</sup>,**  
11 **Terrence J. Sejnowski<sup>2,3\*</sup>**

12  
13  
14  
15 **Affiliations:**

16  
17 1-Department of Electrical and Computer Engineering, Jacobs School of Engineering, UC San Diego; 2-Computational  
18 Neurobiology Laboratory, The Salk Institute for Biological Sciences, La Jolla, CA 92037; 3-Division of Biological Sciences,  
19 University of California, San Diego, La Jolla, CA 92093; 4-Center for Learning and Memory, The University of Texas at Austin,  
20 Austin, TX 78712; 5-Department of Neuroscience, The University of Texas at Austin, Austin, TX 78712; 6-Department of  
21 Psychology, University of Otago, 9054 Dunedin, New Zealand

22  
23  
24 **\*For correspondence:**

25 **Email:**

26 [terry@salk.edu](mailto:terry@salk.edu) (TJS);  
27 [kharris@utexas.edu](mailto:kharris@utexas.edu) (KMH);  
28 [cliff.abraham@otago.ac.nz](mailto:cliff.abraham@otago.ac.nz) (WCA);  
29 [msamavat@ucsd.edu](mailto:msamavat@ucsd.edu) (MS)

44  
45  
46  
47  
48  
49

## Abstract (354 words)

50 Connectomics is generating an ever-increasing deluge of data, which challenges us to develop new methods for analyzing  
51 and extracting insights from these data. We introduce here a powerful method for analyzing three-dimensional  
52 reconstruction from serial section electron microscopy (3DEM) to measure synaptic information storage capacity (SISC)  
53 and apply it to data following *in vivo* long-term potentiation (LTP). Connectomic researchers have focused on the pattern  
54 of connectivity between neurons. The strengths of synapses have also been studied by quantifying the sizes of synapses.  
55 Importantly, synapses from the same axon onto the same dendrite have a common history of coactivation, making them a  
56 candidate for measuring the precision of synaptic plasticity based on the similarity of their dimensions. Quantifying precision  
57 is fundamental to understanding information storage and retrieval in neural circuits. We quantify this precision with Shannon  
58 information theory, which is a more reliable estimate than prior analyses based on signal detection theory because there  
59 is no overlap between states, and outliers do not artificially bias the outcome. Spine head volumes are well correlated with  
60 other measures of synaptic weight, thus SISC can be determined by identifying the non-overlapping clusters of dendritic  
61 spine head volumes to determine the number of distinguishable synaptic weights. SISC analysis of spine head volumes in  
62 the stratum radiatum of hippocampal area CA1 revealed 24 distinguishable states (4.1 bits). In contrast, spine head  
63 volumes in the middle molecular layer of control dentate gyrus occupied only 5 distinguishable states (2 bits). Thus,  
64 synapses in different hippocampal regions had significantly different SISCs. Moreover, these were not fixed properties but  
65 increased by 30 min following induction of LTP in the dentate gyrus to occupy 10 distinguishable states (3 bits), and this  
66 increase lasted for at least 2 hours. We also observed a broader and nearly uniform distribution of spine head volumes  
67 across the increased number of states, suggesting the distribution evolved towards the theoretical upper bound of SISC  
68 following LTP. For dentate granule cells these findings show that the spine size range was broadened by the interplay  
69 among synaptic plasticity mechanisms. SISC provides a new analytical measure to probe these mechanisms in normal  
70 and diseased brains.

## 71 Introduction

72 In the late 19th century, Santiago Ramón y Cajal proposed that memories are stored at synapses and not through the  
73 generation of new neurons (**Ramón y Cajal, 1894**). Since then, there has been an extensive search for synaptic  
74 mechanisms responsible for learning and memory. In particular, long-term potentiation (LTP) has become a standard model  
75 for investigating cellular, synaptic, and molecular mechanisms of learning and memory. Numerous structural consequences  
76 have been shown to accompany LTP. For example, the density and proximity of docked vesicles at the presynaptic active  
77 zone area is increased and may explain the enhanced release probability (**Jung et al., 2021**). Dendritic spines and the  
78 area of the postsynaptic density (PSD) enlarge at the expense of new spine outgrowth in the mature hippocampus (**Bourne  
79 and Harris, 2011; Bell et al., 2014; Harris, 2020**). Although synaptic plasticity is well-established as an experience-  
80 dependent mechanism for modifying these and other synaptic features, the precision of this mechanism is unknown.

81 The existence of both intrinsic and extrinsic origins of variability and dysfunction of structural modulation (**Kasai et al.,  
82 2021**) motivates further exploration of the potential precision with which synaptic strengths can be adjusted. From an  
83 information theory perspective, there can be no information stored without precision – the more precise synaptic plasticity  
84 is, more distinguishable synaptic states are possible and the greater amount of information that can be stored at the  
85 synapses. The synaptic weight is itself the information that is stored at a synapse, and this information is retrieved when  
86 synaptic transmission subsequently occurs. Note that synapses are complex dynamical structures and “synaptic weight”  
87 is not a single scalar value but rather is a vector composed of intrinsic functional pre- and postsynaptic variables. These  
88 variables can be modulated by synaptic plasticity. Included in the vector of variables are the probability of presynaptic  
89 vesicular release, number of docked vesicles, number of postsynaptic receptors, and degree of short-term  
90 facilitation/depression, to name but a few. Thus over a series of test pulses applied to a given synapse, the resulting train

of stochastic excitatory postsynaptic potentials (EPSPs) is expected to vary in amplitude and number of EPSP events from stimulus to stimulus, and vary in a way that is consistent with the synaptic weight vector (*Kandaswamy et al., 2010; Klyachko et al., 2006*). Several studies have shown that synaptic strength is highly correlated with dendritic spine head volume (*Harvey and Svoboda, 2007; Matsuzaki et al., 2004; Harris, 2020, reviewed papers in Yang and Lui, 2022*). Pairs of dendritic spines on the same dendrite that receive input from the same axon (SDSA pairs) occur naturally in the brain and are expected to have experienced the same activation histories (*Harris and Sorra, 1998; Kumar et al., 2020*). Hence, synaptic weight precision can be estimated by measuring the difference between the spine head volumes of SDSA pairs, and this information can then be used to calculate the number of distinguishable synaptic states in a synaptic pathway.

In previous studies (*Bartol et al., 2015, Bromer et al., 2018*), signal detection theory was used to estimate the number of distinguishable synaptic strengths with an assumed signal-to-noise ratio of 1 across the range of spine head volumes. Signal detection theory determines the probability of detecting a signal in noise depending on the overlap between the two distributions. A threshold for the amount of overlap determines the separation between them. In its application to identify distinguishable synaptic strengths, we chose an overlap threshold of 31%, so that an ideal observer would correctly assign a given sample to the correct distribution 69% of the time. Outcomes from these analyses of CA1 pyramidal cell apical dendrites revealed a remarkably high precision with 26 Gaussian distributions spanning the range of SDSA pairs (*Bartol et al., 2015*). However, signal detection theory has limitations. For example, if a single large spine head volume (e.g., a  $0.55 \mu\text{m}^3$  spine head found in another dataset, *Harris and Stevens, 1989*) were added to the dataset, we would predict 39 distinguishable Gaussians spanning the range, an increase of 50% in the number of states. In *Bartol et al. (2015)* there are interval gaps with Gaussian distributions across a range of spine head volumes without spine head volumes in the reconstructed tissue. Furthermore, this previous method assumed an arbitrary threshold for the amount of overlap allowed between the consecutive Gaussians. Finally, the method did not take into account the actual frequency of spine head volumes in the distinguishable states.

We used information theory to calculate the number of bits of Shannon information stored in synaptic weights to quantify empirically the synaptic information storage capacity (SISC). Information theory is based on the distinguishability of messages sent from a transmitter to a receiver. In the case of synaptic weight, the postsynaptic dendrite or soma is the receiver, which has to distinguish the strengths of messages coming from discrete synaptic inputs. The distinguishability of the received messages depends on the precision with which synaptic plasticity sets the strength of individual synapses. Statistics and information theory allowed us to quantify the precision and information capacity of the message and how it changes following LTP induction. The analysis of precision in our new method starts with measuring the coefficient of variation (CV) of SDSA pairs, the same starting point as in *Bartol et al. (2015)*. The new method, however, performs non-overlapping cluster analysis to obtain the number of distinguishable categories of spine head volumes in the reconstructed volume using the precision level estimated from the CV of the SDSA pairs. In the new SISC analysis, the number of distinct synaptic states defined by the individual clusters converges toward the true number of states as the number of spine head volumes increases and the true shape of the distribution is sampled. There are more distinguishable states with greater Shannon information when the precision is higher.

Comparison of the new SISC measurements with the previous results demonstrates that the new method is more robust to outliers and, importantly, can reveal gaps and variation in the shape of the distribution. In contrast, with signal detection theory the gaps were filled in with Gaussians in the absence of any data. SISC was applied to synapses in control hippocampal area CA1 that was perfusion-fixed *in vivo*, and in the dentate gyrus perfusion-fixed at 30 minutes and 2 hours after the induction of unilateral LTP compared to the contralateral control hemisphere *in vivo*. The results revealed robust differences between the brain regions and across conditions following synaptic plasticity.

## Results

### Induction of LTP in the Dentate Gyrus

We analyzed datasets of 3D reconstruction from serial section electron microscopy (3DEM) containing perforant path synapses in the middle molecular layer (MML) of the dentate gyrus for inputs arising from the medial entorhinal cortex. Data were collected from the stimulated hippocampus of two rats at 30 minutes and two rats at 2 hours post-induction of

139 LTP, with the hippocampus in the opposite hemisphere serving as the control. All experiments were conducted in the  
140 middle of the animals' waking (dark) period to control for variation due to the circadian cycle (**Bowden et al., 2012**). Analysis  
141 of the 30 min control and LTP datasets using our previous signal detection method (**Bartol et al., 2015**) was published in  
142 **Bromer et al. (2018)**. Although the stimulus protocol is known to induce multiple forms of plasticity including LTP,  
143 heterosynaptic LTD (**Abraham & Goddard 1983, Bowden et al 2012**), and EPSP-spike potentiation (**Abraham et al, J**  
144 **Physiology, 1985**), for simplicity we refer to the stimulated groups as 30 min LTP and 2 hr LTP, as this is what was  
145 measured electrophysiologically on the stimulated pathways.

146 We used previously described methods to induce LTP in the MML of freely moving rats (**Bowden et al., 2012**). Briefly,  
147 stimulating electrodes were surgically implanted in both the medial and lateral perforant paths of the LTP hemisphere, and  
148 an additional stimulating electrode was implanted in the medial path of the control hemisphere. Field potential recordings  
149 were made using electrodes placed bilaterally in the dentate hilus. Animals were allowed to recover for two weeks prior to  
150 producing LTP or control stimulation during the animals' dark (waking) part of the circadian cycle. LTP was induced by 50  
151 trains of unilateral delta-burst stimulation (DBS) to the medial path electrode and then recorded for either 30 min or 2 hr,  
152 timed from the beginning of the delta-burst stimulation. Relative to the two control hemispheres, the LTP hemispheres  
153 showed an average of 41% potentiation in the MML for the 30 min experiment (**Fig. 1A, B**). In the 2 hr experiment, there  
154 was an average of 37% LTP for the two animals (**Fig. 1C**).

155 Serial electron micrographs and 3D reconstructions were prepared from the control (**Fig. 1D**) and 30 min LTP (**Fig. 1E**)  
156 hemispheres of two animals, and the control (**Fig. 1F**) and 2 hr LTP (**Fig. 1G**) hemispheres of the other two animals. Three-  
157 dimensional reconstructions were made for all of the dendritic spines and synapses occurring along three dendritic  
158 segments from each of the control and LTP hemispheres for a total of 24 dendrites and 862 dendritic spines. Axons that  
159 were presynaptic to at least 1 of 15 dendritic spines located along the middle of the dendritic segment were traced to  
160 determine whether they made more than one synapse along the same dendrite, and thus formed SDSA pairs. All 3D  
161 reconstructions and measurements were obtained blind as to condition or animal.

162  
163

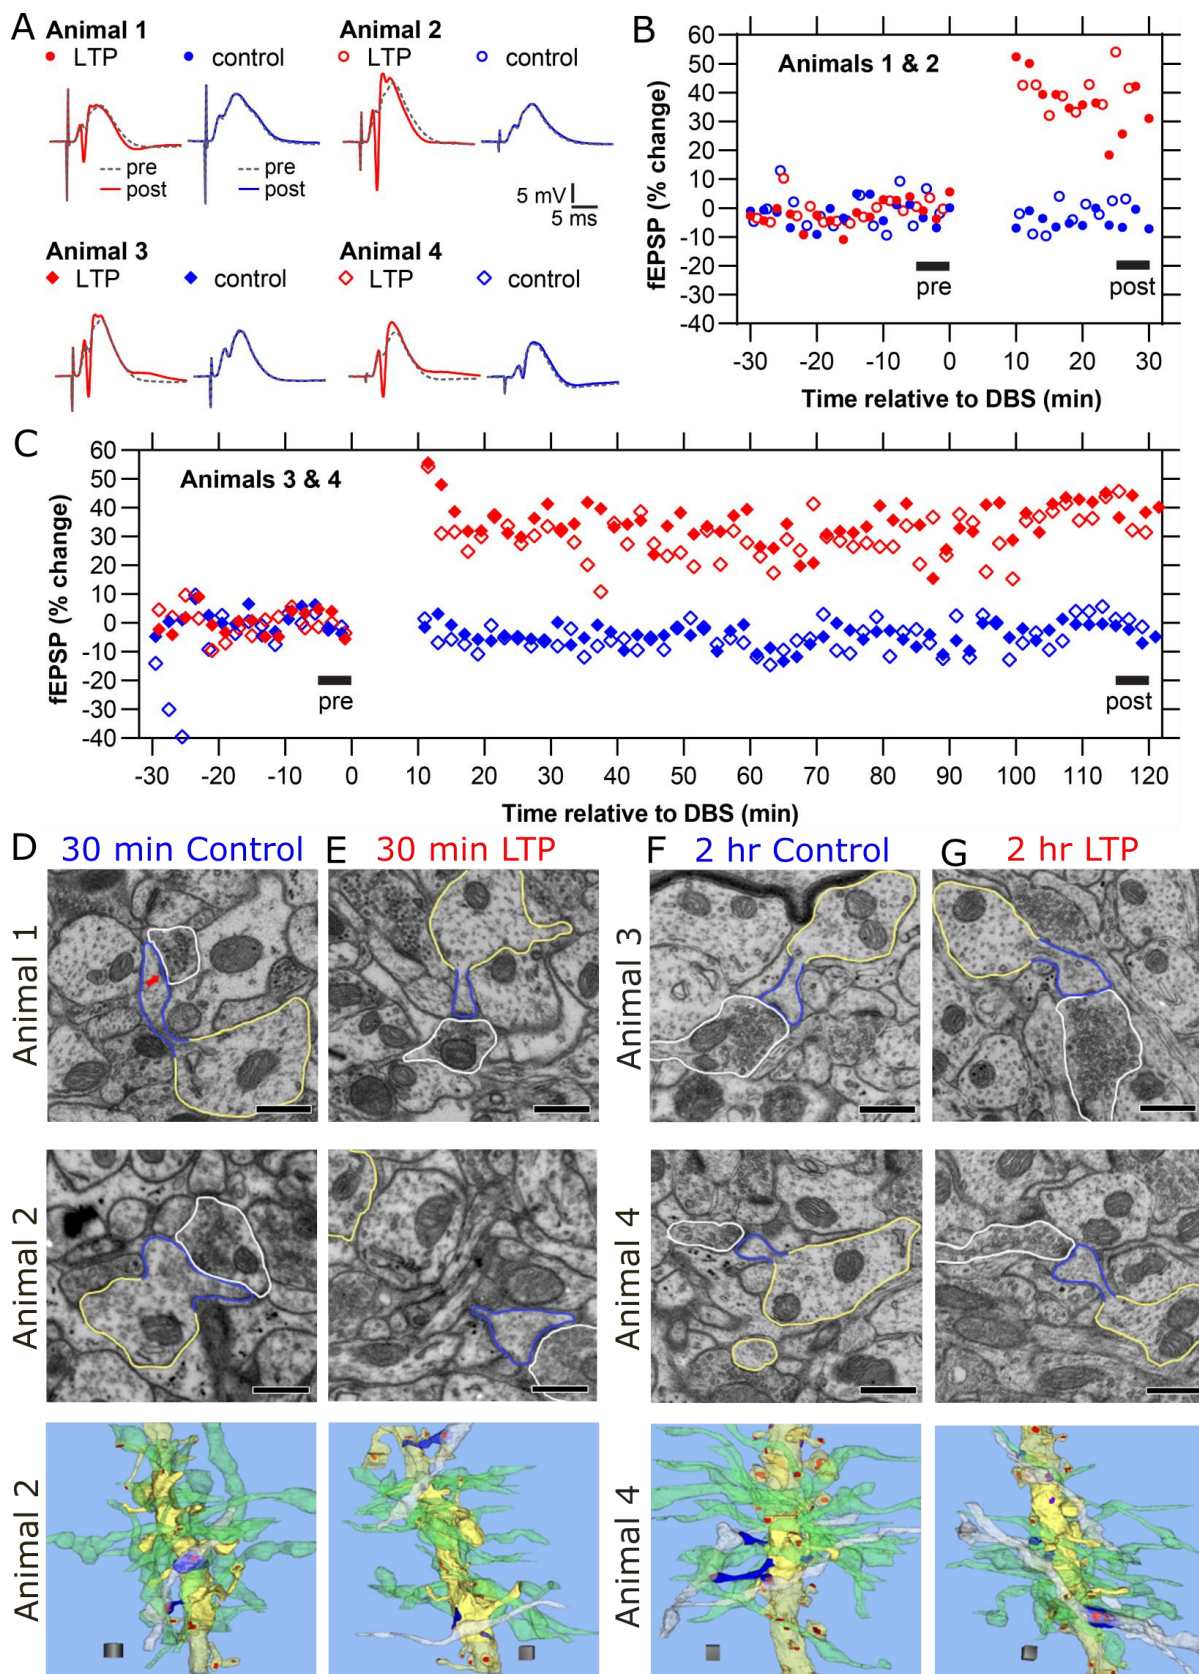

164  
165

166  
167

Fig. 1: LTP and control responses monitored for 30 min and 2 hours prior to preparation for 3DEM, and representative dendrites from the control and LTP hemispheres in MML.

168 (A) Representative waveforms from baseline responses (dotted, pre) superimposed on responses following delta-burst  
169 stimulation (solid, post) in the LTP (red) or control (blue) hemispheres. (Unique symbols are indicated for each animal and  
170 plotted in B and C). (B) Change in fEPSP slopes relative to baseline stimulation in the LTP (red) or control (blue)  
171 hemispheres monitored for 30 minutes prior to fixation. The average change relative to baseline stimulation in fEPSP  
172 response was 34% and 48% at 30 minutes post-LTP induction and 0% for controls. (C) Change in fEPSP slopes relative  
173 to baseline stimulation in the LTP (red) or control (blue) hemispheres monitored for 2 hours prior to fixation. The average  
174 change in fEPSP slopes relative to baseline stimulation was 41% and 34% for the LTP (red) and 0% for control (blue)  
175 hemispheres. (D-G) Example electron micrographs (with red arrow in **Fig. 1D** (first row) pointing to the PSD) and 3D  
176 reconstructions in the control and LTP hemispheres as indicated for each of the 4 animals. (Scale bars = 0.5  $\mu\text{m}$ .) Bottom  
177 row illustrates representative dendrites from control and LTP conditions in Animals 2 and 4 with segment lengths across  
178 the row of 9.25, 10.62, 9.44, and 11.33  $\mu\text{m}$ , respectively. Axons synapsing on 15 spines along the middle of the dendrite  
179 (solid yellow) were analyzed for presynaptic connectivity. Most of the axons (green) made synapses with just one dendritic  
180 spine, and some axons (white) made synapses with two dendritic spines (blue). Thus, the white axons illustrate the SDSA  
181 pairs. The dendritic shaft and spines occurring along the rest of the reconstructed dendrite are illustrated in translucent  
182 yellow. All excitatory synapses are illustrated in red, and the inhibitory synapses in purple. Scale cube = 1  $\mu\text{m}^3$ .  
183 **Supplementary Videos 1-4** for 3D illustration of **Figs. 1D-G** are provided.

#### 184 **Comparison of Spine Sizes of 30 min and 2 hr LTP Conditions to Control Stimulation**

185 We analyzed the 4 dentate gyrus MML datasets to see how LTP at 30 min and 2 hours post-induction affected spine head  
186 volumes. **Fig. 2** compares the spine head volume histograms before and after the induction of LTP. Control histograms  
187 from the unstimulated hemisphere (**Fig. 2A, 2B**) are presented above their corresponding LTP histograms (**Fig. 2C, 2D**).  
188 The differences between the LTP and the control histograms revealed increases in the numbers of both large and small  
189 synapses at both time points (**Fig. 2E**). These findings suggest potentiation of stimulated synapses and concurrent  
190 depression of presumptive non-stimulated synapses. However, by 2 hours the peaks and troughs shifted such that the  
191 increase in smaller spines was significantly reduced and the increase in larger spines was significantly consolidated (**Fig.**  
192 **2F**). We designed a statistical test (see methods for details) to test if the observed summed differences between the  
193 frequency of 2 hr LTP and that of 30 min LTP (across equal width bins on a log scale for spine head volumes) is significant.  
194 We found the significance of the observed differences in **Fig. 2F**. The P value =  $6 \times 10^{-4}$  for the observed bump in **Fig. 2F**  
195 for spine head volumes greater than median value (vertical dashed line), and P value = 0.0015 for the observed troughs  
196 smaller than median. The same test was performed on all observed peaks and troughs of the trajectories in **Fig. 2E,F**  
197 and are significant (P Value < 0.005).

198 This finding means that by 2 hours the largest synaptic spines were markedly increased in frequency. To evaluate  
199 whether the increase in both small and large spine heads resulted in a balanced total synaptic input, we performed an  
200 unbiased dendritic segment analysis based on the reconstructions of the intermediate portions of the dendritic segments  
201 for all 24 reconstructed dendrites (**Fig. 1D, E, F, G**, Animal 2, solid yellow). None of the findings could be explained by  
202 changes in the number of spines or axons per micrometer length of dendrite that were similar between the control and 30  
203 min and 2 hr LTP dendrites (**Fig. 3A, C**). Furthermore, the summed asymmetric synaptic area across all synapses per  
204 micrometer of dendritic length was constant across the control and 30 min and 2 hr LTP conditions (**Fig. 3B, D**). Thus, the  
205 enlargement of some spines was counterbalanced by shrinking of others, and the summed synaptic input remained  
206 constant along these local stretches of dendrite across time and conditions, consistent with previously published results in  
207 CA1 **Bourne and Harris (2011)**.

208 We repeated this analysis for each rat (**Supplementary Fig 1**). The peaks and troughs of differences between the LTP  
209 and the control histograms at both time points were also significant, confirming the robustness of these findings.

210  
211

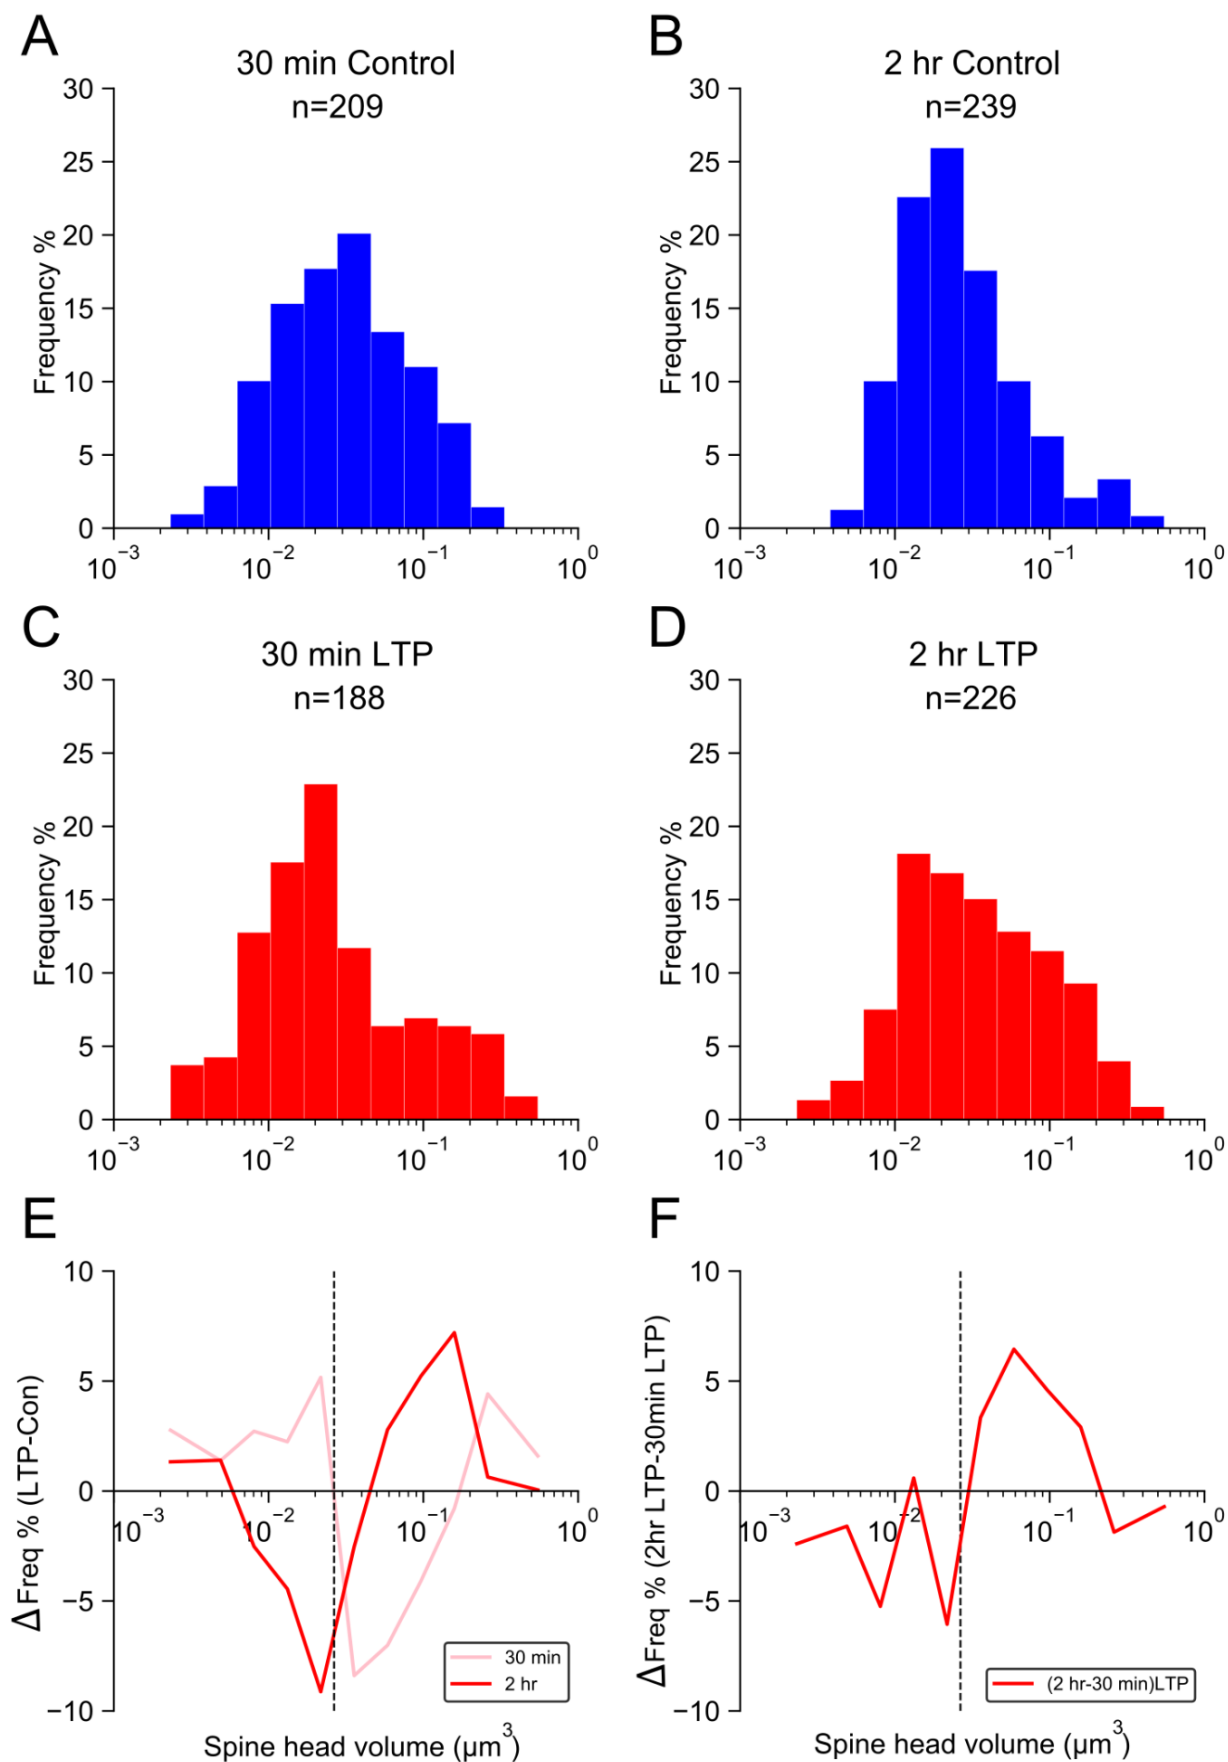

213 Fig. 2: Change relative to control hemispheres in the distribution of spine head volumes at 30 min and 2 hr after the  
214 induction of LTP. (A-D) Frequency distributions of spine head volumes (on log scale) from control and LTP hemispheres  
215 as indicated. (E) Difference between the frequency of spine head volumes in control and LTP conditions (i.e., LTP - control)  
216 at 30 min. (F) Difference between the frequency of spine head volumes in 30 min LTP (C) and 2 hr LTP (D) conditions.  
217 The differences in the summations of the representative frequencies (the test statistic) in the observed peaks and troughs  
218 in both **Fig. 2E, F** were tested for significance by hypothesis testing with nonparametric bootstrap (see methods). The  
219 vertical dash line is the median of combined dentate gyrus spine head volumes. All observed peaks and troughs in both  
220 **Fig. 2E, F** were found to be statistically significant ( $P < 0.005$  for all peaks and troughs).



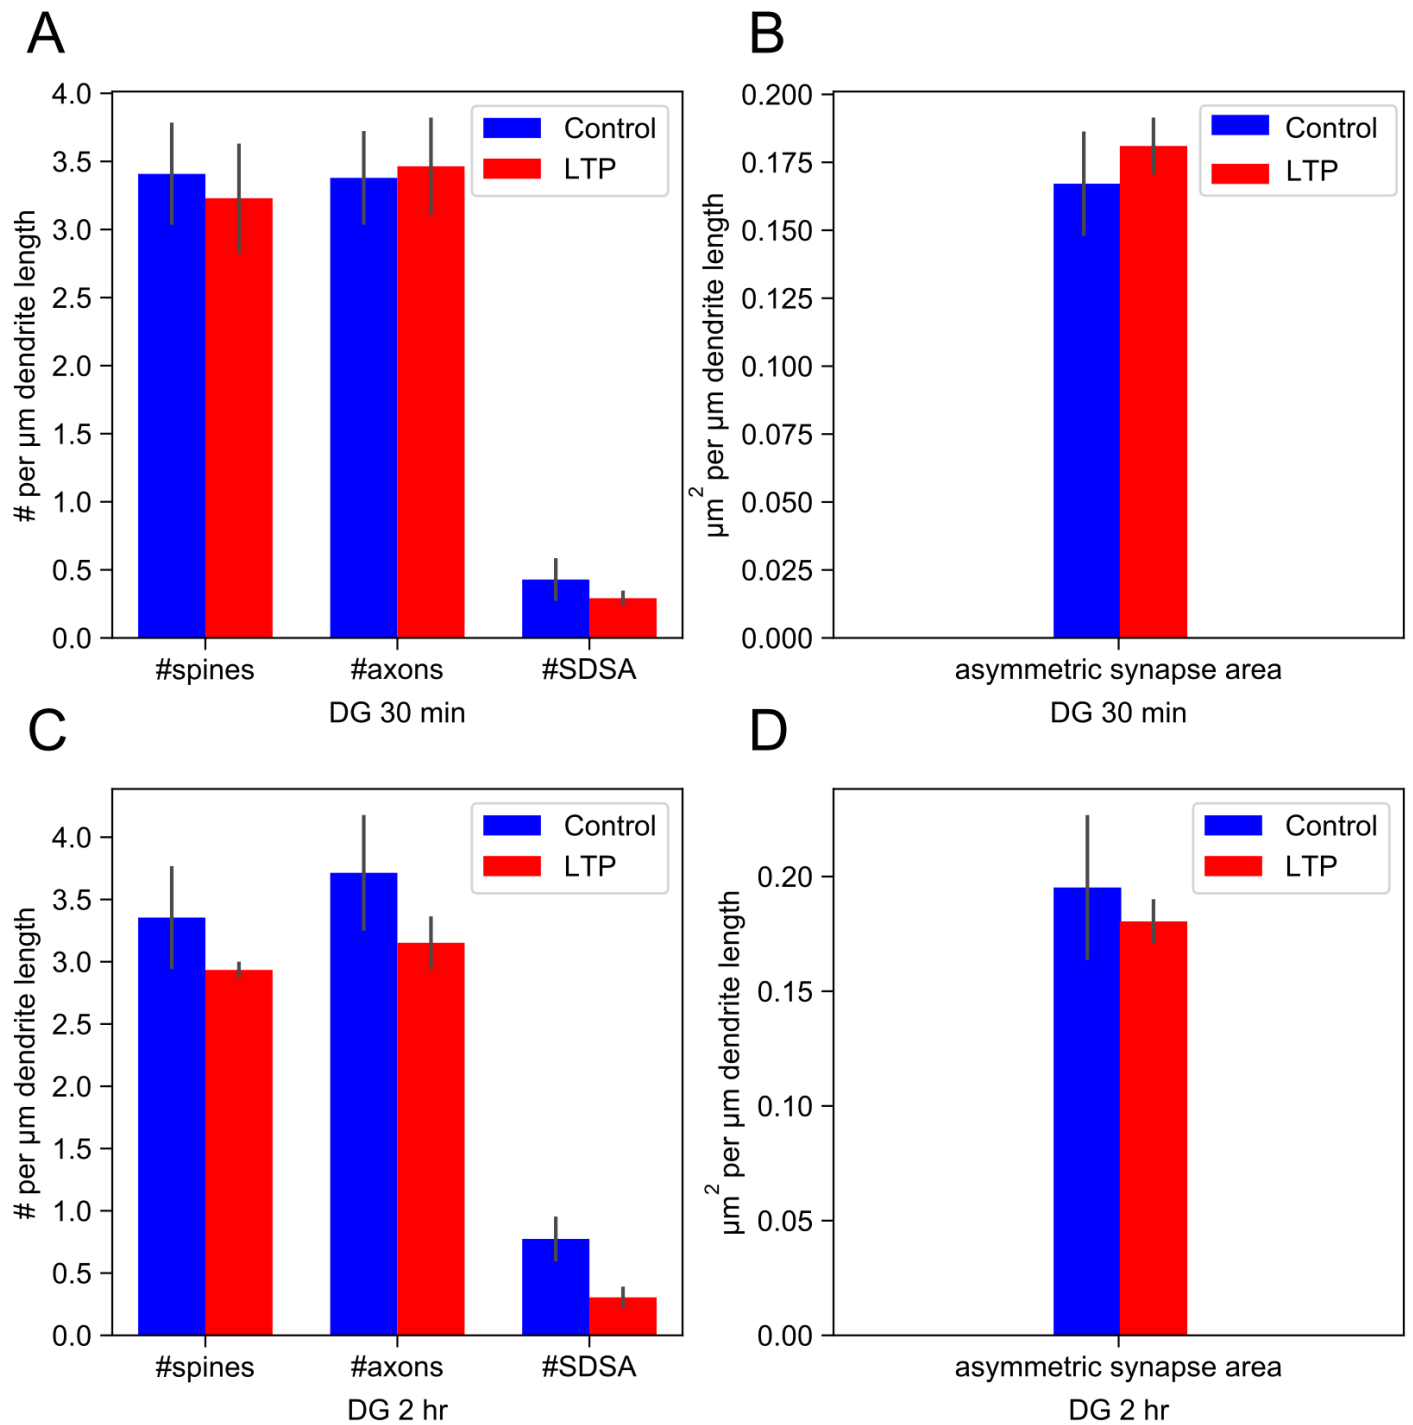

221

222 Fig. 3: LTP does not change the number of spines, axons, or the summed synaptic area per unbiased length of dendrite  
223 in the dentate gyrus. (A) (C) Bar plot of the number (per micrometer length of dendrite, mean  $\pm$  SEM) of spines, axons,  
224 and axons participating in SDSA pairs. There is no significant difference between control (ctrl) and LTP hemispheres for  
225 30 min and 2 hr except for the SDSA counts. (B) (D) The total asymmetric synapse area (based on the PSD area per  
226 dendrite micrometer), including spines and asymmetric shaft synapses) was not significantly different between the two  
227 LTP conditions relative to control.

228  
229  
230  
231  
232  
233  
234  
235  
236  
237

### Precision Analysis

Precision is defined as the degree of reproducibility of a measurement and is often mistaken for accuracy, which is defined as the deviation of the average measurement from a reference value (**Supplementary Fig. 2**). The CV shown in equation (eq) 1 is a statistic that measures the variations within a sample, defined by the standard deviation ( $\sigma$ ) eq 2, normalized by the mean of the sample ( $\mu$ ), making it a useful metric for measuring precision. Here we used  $N = 2$  in eq 2 because we analyzed SDSA pairs.

$$CV = \frac{\sigma}{\mu} \quad (1)$$

$$\sigma = \sqrt{\frac{1}{N-1} \sum_{i=1}^N (x_i - \mu)^2} \quad (2)$$

238  
239

Precision is a key factor for discovering the number of distinguishable states for spine head volumes. The precision is used by the clustering algorithm (see Methods “Clustering Algorithm”) to assign each spine head to its appropriate bin. To estimate the precision, first we determined that the measurement error among 4 investigators who independently measured all of the spine head volumes in the CA1 dataset (**Supplementary Fig. 3**) was smaller than the intrinsic variability of the measured spine head volumes of the SDSA spine pairs. Then we could measure the precision of spine head volumes within the SDSA pairs to estimate the precision of synaptic plasticity. To do this we calculated the CV of all SDSA pairs in each of the 5 datasets (**Fig. 4**). None of the correlations between the CV values and mean spine head volumes for the SDSA pairs within each condition were significant. The CVs among SDSA pairs vary from pair to pair by over an order of magnitude within datasets for control and 30 min and 2 hr post LTP induction conditions (Fig. 4), but with no significant trend from the smallest to the largest spine head volumes. These outcomes suggest that the synaptic plasticity based on co-activation history among small spines is as precise as it is for large spines for both control and LTP conditions. It is important to note that the estimate of precision of synaptic plasticity provided by the SDSA pairs applies to all synapses of the same type in a given brain region, and not just SDSA pairs.

253  
254  
255  
256  
257  
258  
259

In addition, the difference between the CV of SDSA pairs in CA1 was much less (**Fig. 4E**) than in the combined dentate gyrus datasets, which did not differ from one another (**Fig. 4F**). Thus, the CV of the SDSA pairs did not differ significantly across the dentate gyrus MML conditions, but did differ significantly between the two hippocampal regions. The median CV value establishes the precision level of the sets of SDSA pairs in each of the 5 datasets and is used below for cluster analysis and calculation of the number of distinguishable synaptic strength levels. The rationale behind using median CV as a constant threshold for clustering spine head volumes across the range of spine head volumes is our observation that small spines are as precise as large spines for both control and LTP conditions.

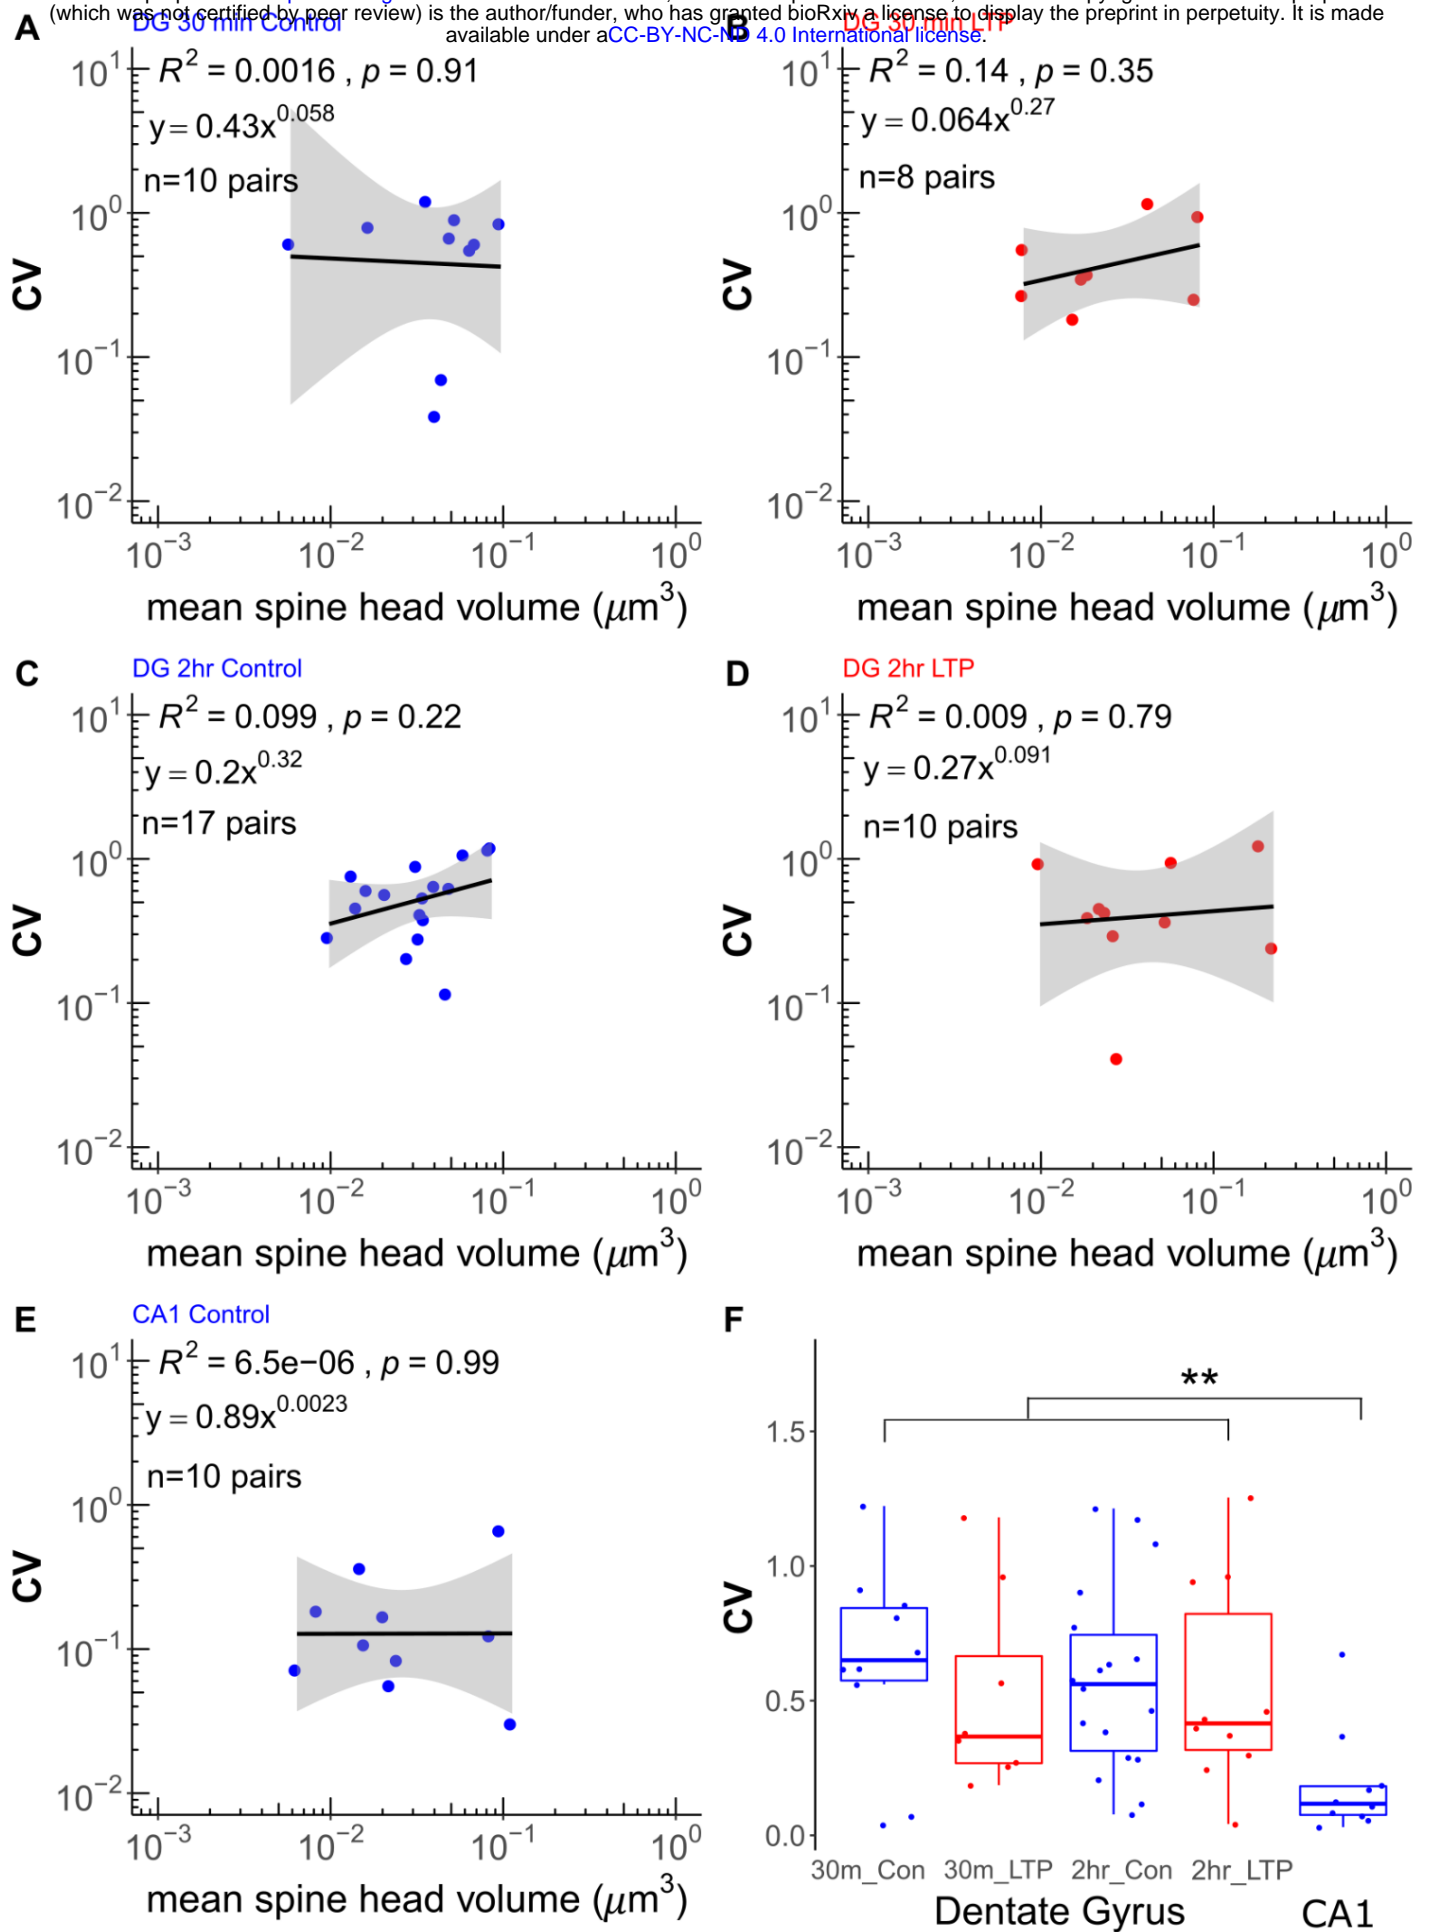

Fig. 4: Analysis of synaptic precision based on CV of SDSA pairs across brain regions and plasticity.

(A-E) Same-dendrite same-axon (SDSA) pairs were analyzed from each dataset. The regression line,  $p$  value, and  $R^2$  for the CV of  $n$  SDSA pairs are shown for each indicated condition and hippocampal region (The lowest CV of **Fig. 4 C**,  $n=18$  is treated as an outlier and removed). The gray region is the 95% confidence interval for each regression line. The Y axis is the CV for each SDSA pair depicted by blue and red dots in control and LTP conditions, respectively. The X axis shows the mean value of the spine head volumes, on a log scale, for each SDSA pair. (F) Summary medians and interquartile ranges (See methods for details) for the dentate gyrus and CA1 datasets combined (overall Kruskal-Wallis  $p$ -value=0.00085) show there is a statistically significant difference between the CV of the CA1 SDSA pairs and those in dentate gyrus (asterisks represent significance of the  $p$  ( $* < 0.05$ ;  $** < 0.01$ )). To test differences between the control and LTP CVs within the dentate gyrus, the 2 lowest CV values from dentate gyrus 30 min control and 2 hr control are treated as outliers and removed. The one factor KW test (on the first four columns) showed no significant difference between the four dentate gyrus conditions ( $p=0.16$ ). Interestingly, the  $p$  value of the one factor KW test between the CV of the dentate gyrus control (30 min and 2 hr combined) and LTP (30 min and 2 hr combined) is not significant ( $p=0.06$ ), but is a trend that could become significant with more data points. Thus, the precision level was significantly higher in area CA1 than dentate gyrus, but not significantly different across the dentate gyrus control and LTP conditions.

### Measurement of the Distinguishable State Distribution

To introduce and compare the performance of our new method for measuring the distinguishable state distribution, we reanalyzed the CA1 dataset that was previously analyzed with signal detection theory (**Bartol et al., 2015**). A total of 288 spine head volumes were fully contained within a  $6 \times 6 \times 5 \mu\text{m}^3$  CA1 neuropil volume (**Fig. 5A**). Signal detection theory revealed 26 distinguishable Gaussian distributions with equal CV (inset, **Fig. 5B**) when assuming an overlap of 31% (**Fig. 5B**). This amount of overlap is equivalent to assuming a signal-to-noise ratio = 1 and a 69% discrimination threshold common in psychophysics (**Schultz, 2007**). Our new clustering method, based upon the median CV of  $0.12 \pm 0.046$  of the SDSA pairs without any assumptions regarding the signal-to-noise ratio (Algorithms 1 and 2, methods), placed the CA1 spine head volumes into 24 distinguishable categories (**Fig. 5C**). The histogram of spine head volumes on a log scale is shown in the inset on panel 5C. The width of the bins was determined by the protocol used for the precision analysis (**Fig. 4**), and is equal to the median CV of the SDSA pairs. The resulting distribution represents the frequency of spine head volumes within their respective categories of distinguishability. Visualizing the data in this way displays the number of spines observed in each of the distinguishable clusters of spine head volumes and the vacant spaces across the distribution of sizes. Note that the shape of the distribution of distinguishable states is not expected to be the same as the histogram of spine head volume frequency. Also, note that bins having a width of the same CV appear as equal width bins in log scale.

The upper left inset contains 3D reconstructions of the smallest and largest spine head volumes. The largest spine in each cluster is illustrated beneath each bin. The highest frequency occurs in cluster #10, which contains 36 spine head volumes (**Fig. 5C**). Interestingly, there appears to be a second peak at around cluster 21.

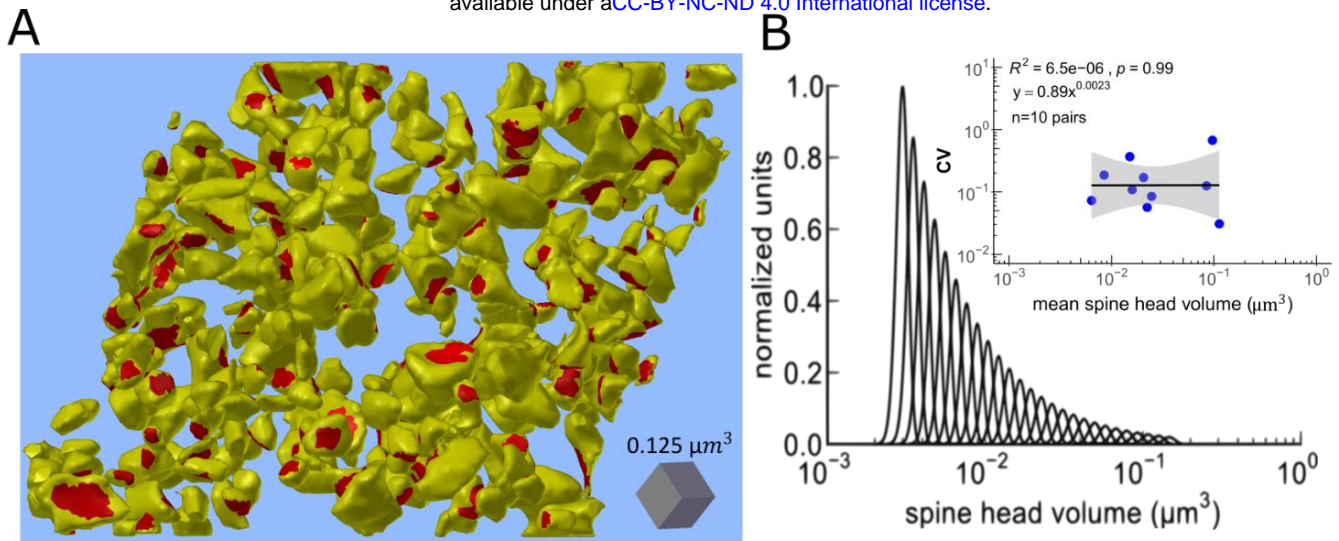

**C** Histogram of Spine Head Volume Categories (CA1)

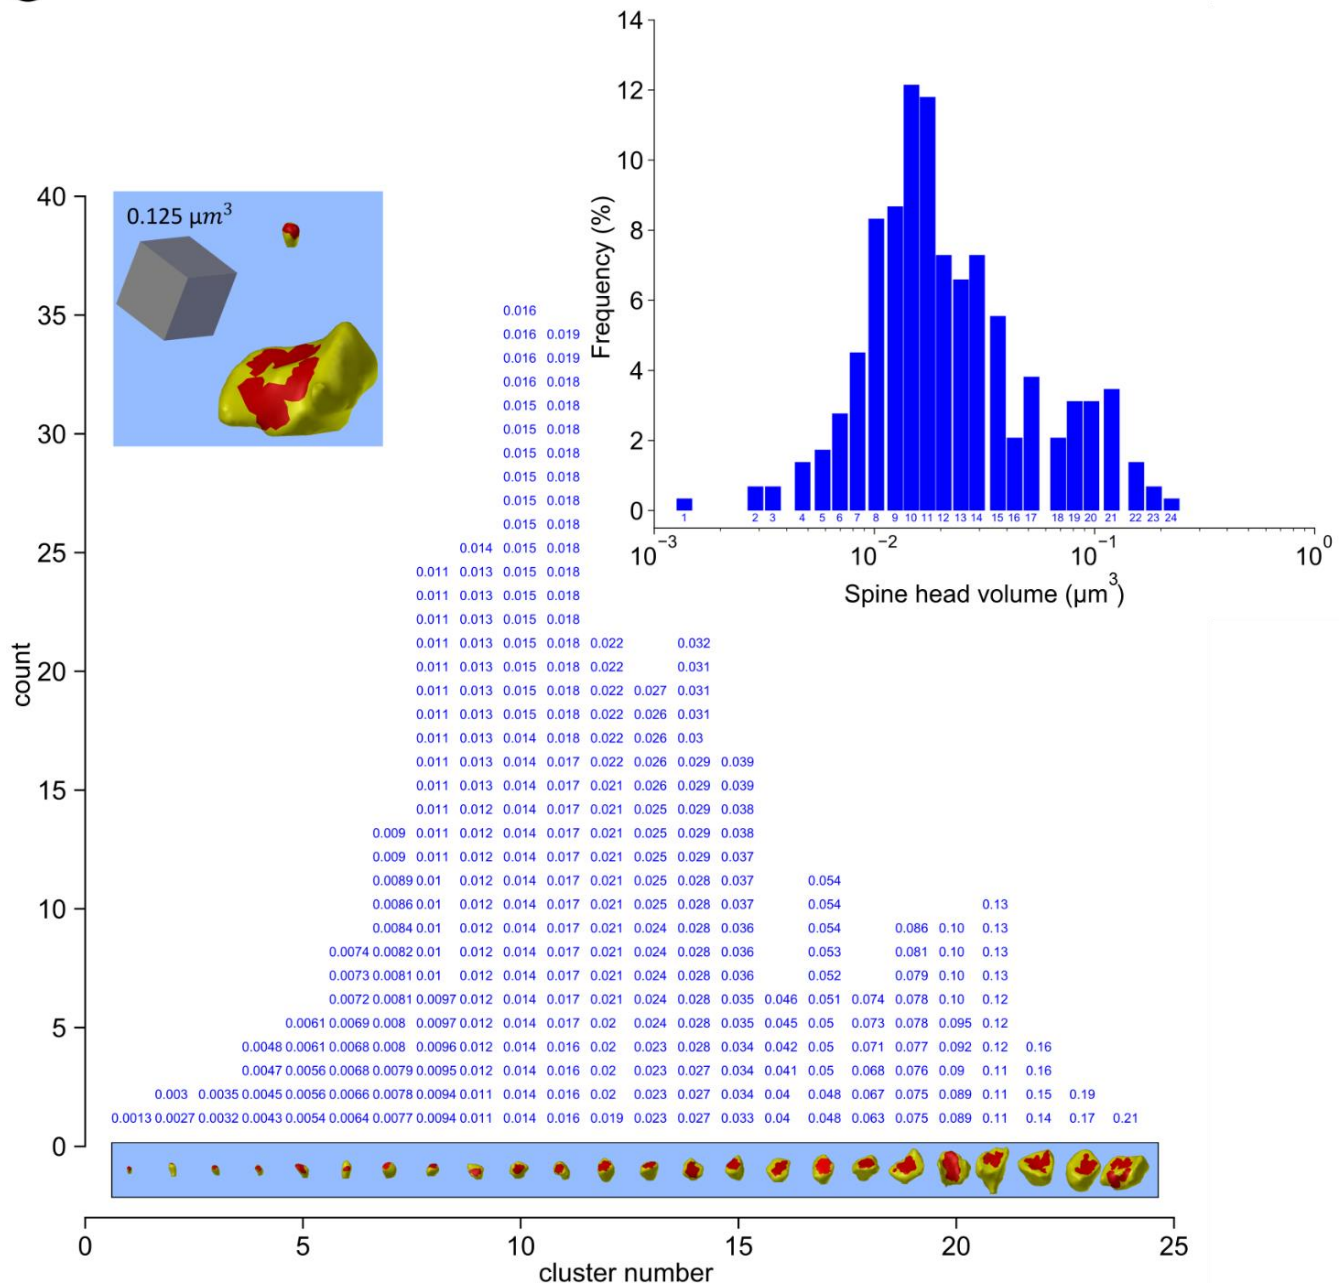

Fig. 5. Clustering the spine head volumes from the area CA1 dataset comparing two methods.

(A) The 288 spine heads fully captured in the reconstructed volume, displaying the PSD (red) and spine head membrane (yellow). (B) **Bartol et al., 2015** using assumptions from signal detection theory showed that 26 distinguishable Gaussian distributions with equal CV (see inset) and overlap of 31% can span the range of spine head volumes of SDSA pairs equivalent to signal to noise ratio of 1 and 69% discrimination threshold common in psychophysics. (C) Our new clustering algorithm (see Algorithm 2, methods) obtained 24 distinguishable categories of all 288 spine heads in the dataset based on the median CV value. The histogram of spine head volumes in log scale is depicted in the panel C inset. The Y axis shows the number of spine head volumes within each category. The actual spine head volumes of the individual spine heads of a given category are stacked vertically in sorted order for that category. The 3D object shown below each category (vertical column) is the actual 3D reconstructed spine head of the largest head volume in the category. The red patches are the postsynaptic densities. The X axis shows the number of distinguishable categories. All spine head volumes are rounded to two significant digits.

### Number of Distinguishable States in the Dentate Gyrus MML During Plasticity

It is important to note that under the previous method, as  $N$  is increased the scale range factor (defined as the ratio of largest spine head volume to the smallest spine head volume) will always increase as the extremes of the distribution are sampled. This outcome will increase the number of Gaussians that span the range, but will tend to overestimate the true value of  $N_c$  when the population is not continuous. However, under the new method, as  $N$  is increased there will be convergence toward the true value of  $N_c$  because the true shape of discontinuous distributions are sampled. With the new method we have access to the true frequency of spine head volumes in the clusters, which allows further calculation of the entropy of the distinguishable synaptic strength states, the potential number of modes in the distribution, and the gaps in the range of spine head volumes (bins with no spine head volumes in them).

To explore changes in SISC during synaptic plasticity, we applied the new clustering methods to the four MML datasets from the dentate gyrus (**Fig. 6**). In order to show the frequency of spine head volumes, the clusters are displayed as histogram bins where each bin is one CV wide. Thus, the CV of spine head volumes within each bin is less than or equal to the median CV found from the SDSA pairs analysis of the specific dataset (see **Fig. 4**, above). Each bin starts with the smallest spine head volume of the representative cluster and ends with a hypothetical spine head volume that is exactly one CV apart (except for the last bin of each condition that is illustrated with the smallest and largest observed data points in that cluster to better demonstrate the expansion of range of sizes after induction of LTP relative to the controls). As one can observe the spine head volumes enlarged and expanded towards the right hand side of the frequency axis after 30 min and 2 hours post induction of LTP.

The 30 min control and 2 hr control rats had 5 and 6 distinguishable clusters, respectively. Thus, the values of  $N_c$  for the control cases were similar despite originating from multiple rats. This closeness between control results validates the repeatability of both the experimental and the computational procedures. At 30 min and 2 hr post-induction of LTP, SISC revealed a higher value of  $N_c$  due to both the expansion of the scale range factor and to the observable decrease in the CV values (**Fig. 4F; Table 1**). However, the  $N_c$  in dentate gyrus either in control or LTP conditions is significantly less than CA1 ( $N_c=24$ ). This highly significant difference likely reflects the known differences between area CA1 and dentate gyrus in activation histories and functions in memory formation (**Snyder, et al., 2001; Saxe, et al., 2006; Krueppel, et al., 2011; Lopez-Rojas, et al., 2016**).

358  
359  
360  
361  
362  
363

Table 1: The number of distinguishable states, or categories, ( $N_c$ ) of spine head volumes.

| Dataset Type                 | # SDSA pairs | Median CV of SDSA set | # spine head volumes | Median spine head volumes ( $\mu m^3$ ) | SRF | $N_c$         |
|------------------------------|--------------|-----------------------|----------------------|-----------------------------------------|-----|---------------|
| dentate gyrus 30 min Control | 10           | $0.65 \pm 0.12$       | 209                  | $0.031 \pm 0.0037$                      | 73  | $5 \pm 0.24$  |
| dentate gyrus 30 min LTP     | 8            | $0.37 \pm 0.16$       | 188                  | $0.022 \pm 0.0014$                      | 236 | $10 \pm 0.51$ |
| dentate gyrus 2 hr Control   | 18           | $0.56 \pm 0.09$       | 239                  | $0.023 \pm 0.0013$                      | 110 | $6 \pm 0.48$  |
| dentate gyrus 2 hr LTP       | 10           | $0.42 \pm 0.15$       | 226                  | $0.031 \pm 0.0036$                      | 141 | $8 \pm 0.20$  |
| CA1                          | 10           | $0.12 \pm 0.046$      | 288                  | $0.018 \pm 0.00091$                     | 163 | $24 \pm 0.98$ |

364  
365  
366  
367

Table 1: For column 3 and 5 the term ( $\pm$  SE), SE stands for standard error calculated using algorithm 1. SRF=scale range factor. The errors on the # of distinguishable clusters is calculated using algorithm 1, 2. For  $N_c$  Algorithm 1,2 used with resampling the spine head volumes and using median CV of the observed SDSA pairs for clustering threshold.

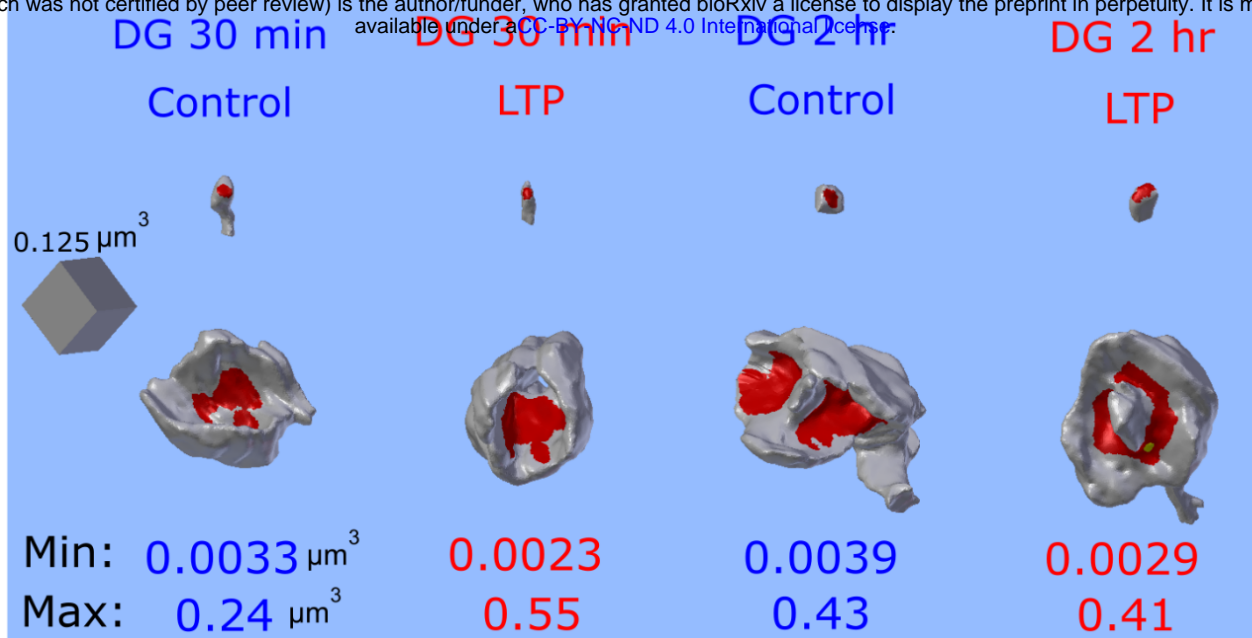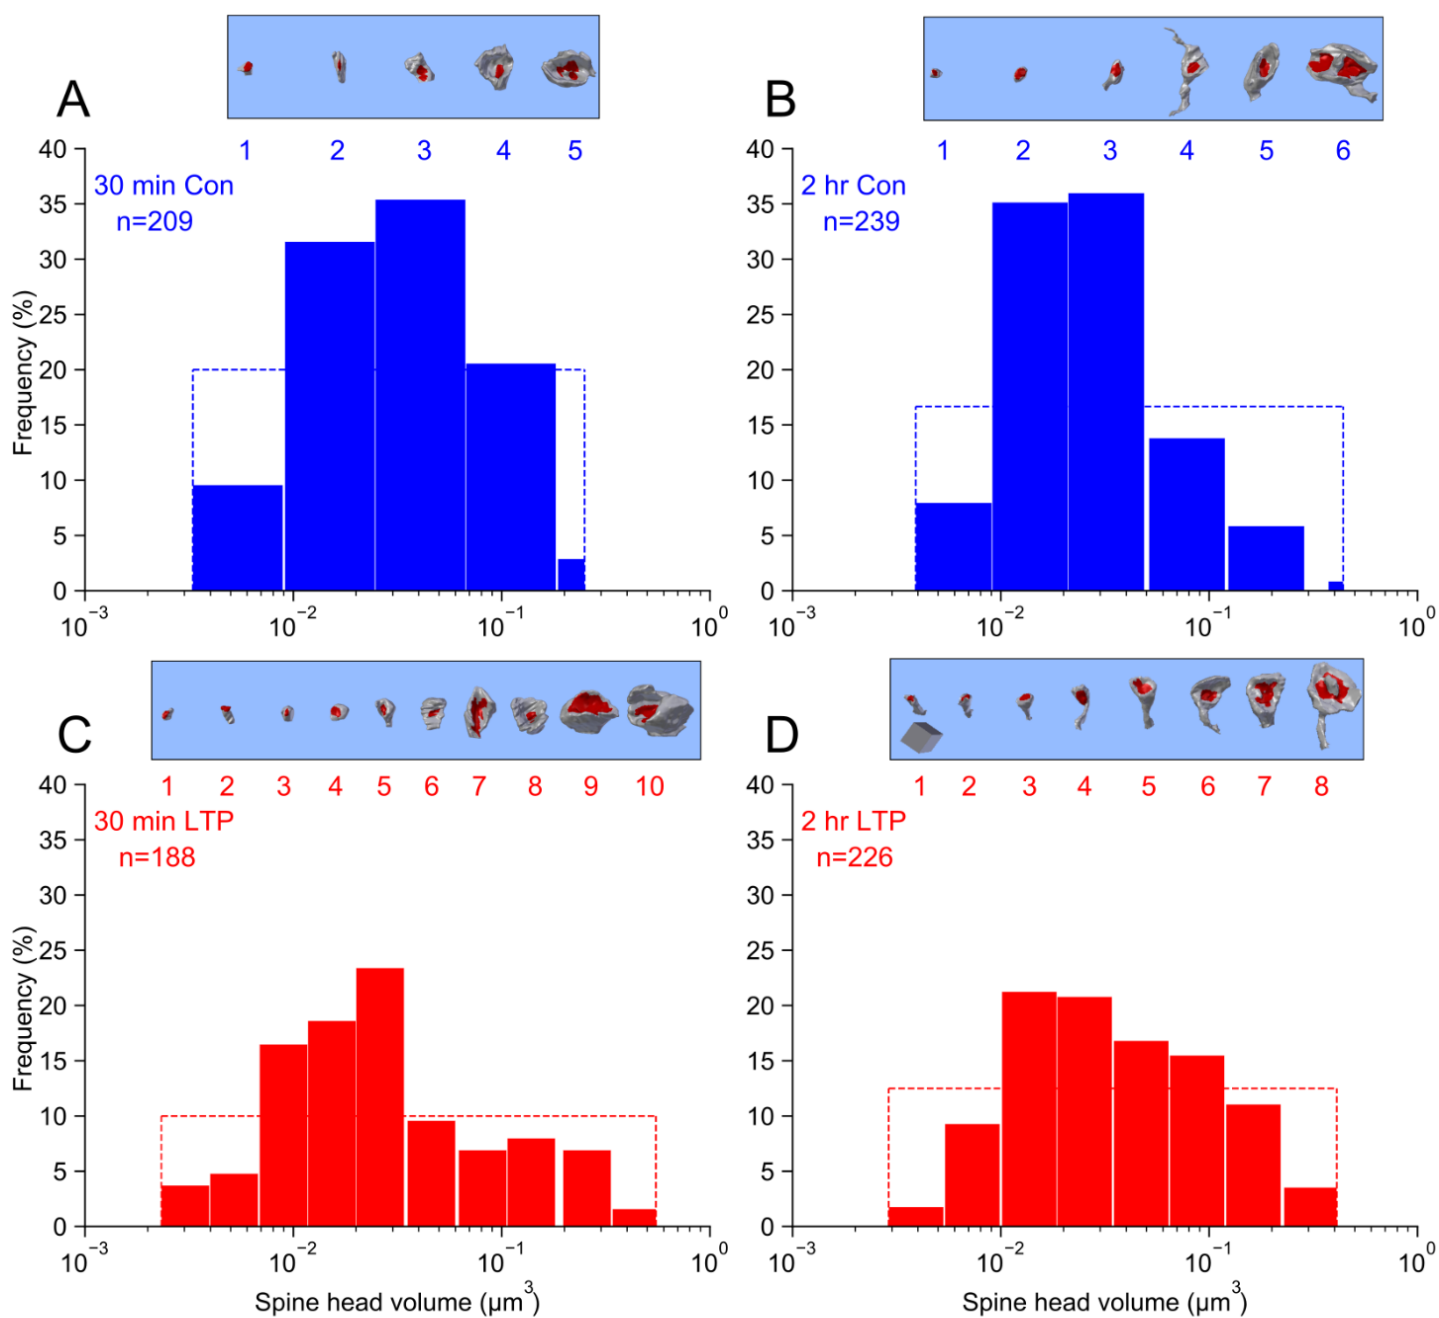



369 Fig. 6: Clustering of spine head volumes in the dentate gyrus datasets.

370 The top panel shows the 3D reconstruction of the smallest and the largest spine head volumes within each dataset with  
371 their volumes indicated at two significant digits. Clustering algorithm 2 was used, as in Fig. 1C, to show that following LTP  
372 there was an increase in  $N_c$ . Here, categories are illustrated as histogram bins with bin widths equal to the CV shown in  
373 Fig. 4 (except that the last bin of each condition is illustrated with observed data points). The categories and actual spine  
374 head volume values are shown in **Supplementary Fig. 5-8**. Blue and red colors indicate Control and LTP conditions,  
375 respectively. For each panel the Y axis shows the counts of spine head volume in the respective bin divided by total number  
376 of spine head volumes in the given dataset and expressed as a percentage. The X axis shows the spine head volumes in  
377  $\mu m^3$  on a log scale. (A) dentate gyrus 30 min Control, (B) dentate gyrus 2 hr LTP, (C) dentate gyrus 30 min LTP, (D) dentate  
378 gyrus 2 hr LTP. The rectangular inset on the top of each histogram shows the largest spine head (on the same scale across  
379 panel A-D; scale cube located on panel D inset =  $0.125 \mu m^3$ ) and category number of each category, and aligns with the  
380 X axis of the category histogram. For comparison of each histogram to the shape of a uniform distribution, the dashed line  
381 indicates the theoretical uniform distribution (with maximum entropy and Shannon information) for the given dataset.

### 382 Shannon Information Storage Capacity of Synapses

383 The concept of entropy,  $H$ , comes from the field of thermodynamics and measures the amount of uncertainty or disorder,  
384 or the number of possible states of a system. Shannon entropy is defined as the average of Shannon information. Shannon  
385 entropy measures the amount of information in the set of distinguishable states, each of which has a probability of  
386 occurrence. With more information, it is possible to distinguish more states. The Shannon entropy of a discrete random  
387 variable is defined as follows:  
388  
389

$$390 H(X) = \mathbb{E} \left[ \log_2 \frac{1}{P_X(X)} \right] = \sum_{x \in \mathcal{X}} P_X(x) \log_2 \frac{1}{P_X(x)} \quad (3)$$

391  
392 The Shannon information per synapse was calculated from the frequency of spine head volumes *in the distinguishable*  
393 *categories* and using equation (3) where each category is considered a different message. Shannon entropy (bits of  
394 information) for the 5 datasets are listed in column four of (Table 2). These data demonstrate that the synapses are not  
395 on/off switches and that the induction of LTP increases the information storage capacity of synapses. The maximum  
396 number of bits is calculated as the  $\log_2(N_c)$ , which sets an upper bound for SISC. We then compared the spine head  
397 volume distinguishable states distributions measured in the control and LTP conditions with a uniform distribution that is  
398 maximal entropy among every discrete distribution for a fixed number of states.

### 399 **KL Divergence Analysis**

400 Measurement of the distance between an observed distribution, for example spine head volume clusters, and a theoretical  
 401 uniform distribution with the same number of states is known as the Kullback-Liebler (KL) divergence. A uniform distribution  
 402 is the maximum entropy discrete probability distribution when there is no constraint on the distribution except having the sum  
 403 of the probabilities equal 1. Formally, the KL divergence between the distribution of spine head volume clusters (P) and  
 404 the uniform distribution of states (U) is the difference between cross entropy of (P) and (U) and the entropy of (P):  $[H(P, U) - H(P)]$ . The purpose is to measure the closeness of the empirical probability distribution of the distinguishable states  
 405 to the maximum entropy distribution with the fixed number of states as the only known constraint on the distribution. When  
 406 the distribution of the distinguishable synaptic states is close to uniform, the KL divergence will be low and the Shannon  
 407 entropy will be nearly maximized. Here we are measuring the fundamental limits of SISC and not the likely efficient coding  
 408 occurring at the population level with the more uniform distinguishable bins. The spine head volume distribution in CA1  
 409 is compared with the uniform distribution with 24 states in **Supplementary Fig. 4** and quantified in Table 2.  
 410

411  
 412 The maximum entropy and KL divergence were all quite low for all four datasets from the dentate gyrus and were around  
 413 50% lower than for CA1 (Table 2, column 6; **Supplementary Fig. 4**). The KL divergence for the 30 minute LTP was not  
 414 different from the control, but the KL divergence for the 2 hour LTP was less than half of its matched control condition  
 415 (Table 2, column 4). This means that the changes in the distribution of spine head volumes that occurred between 30  
 416 minutes and 2 hours shifted toward a more nearly uniform distribution having maximum information due to optimal use of  
 417 the distinguishable states.  
 418

419 Moreover, we calculated the ratio of the KL divergence values over the maximum value that KL divergence can possibly  
 420 have in each case ( $KL / KL_{MAX}$ ) where  $KL_{MAX}$  equals  $H(U)$ . The purpose is to measure the ratio of the measured KL  
 421 divergence value to the maximum value it could hypothetically have (Table 2, column 7). The lower the ratio, the more  
 422 efficient is the usage of distinguishable states for the storage of synaptic strength values across the population of synapses.  
 423 There was a 31% increase in efficiency 30 minutes following LTP and an additional 17% increase after 2 hours. These  
 424 findings imply that LTP moves distributions of spine head volumes toward maximum information storage limit and maximum  
 425 efficiency due to optimal use of the distinguishable states.  
 426

427 Table 2: Calculating the entropy of synaptic weights based on the calculated frequency of distinguishable synaptic states.

| Dataset                      | mean of SHVs   | CV of all SHVs | Shannon Entropy $H(P)$ | Maximum Entropy $H(U)$ | KL (P  U)    | KL (P  U)/ $H(U)$ |
|------------------------------|----------------|----------------|------------------------|------------------------|--------------|-------------------|
| dentate gyrus 30 min Control | 0.049 ± 0.0037 | 1.24 ± 0.077   | 2.0 ± 0.32             | 2.32 ± 0.34            | 0.33 ± 0.1   | 0.14 ± 0.045      |
| dentate gyrus 30 min LTP     | 0.053 ± 0.0067 | 1.72 ± 0.15    | 3.0 ± 0.42             | 3.32 ± 0.42            | 0.32 ± 0.089 | 0.096 ± 0.035     |
| dentate gyrus 2 hr Control   | 0.040 ± 0.0034 | 1.084 ± 0.081  | 2.05 ± 0.27            | 2.59 ± 0.29            | 0.53 ± 0.10  | 0.21 ± 0.040      |
| dentate gyrus 2 hr LTP       | 0.060 ± 0.0052 | 1.41 ± 0.089   | 2.74 ± 0.41            | 3.0 ± 0.41             | 0.26 ± 0.086 | 0.086 ± 0.038     |
| CA1                          | 0.031 ± 0.0021 | 1.045 ± 0.066  | 4.1 ± 0.39             | 4.6 ± 0.37             | 0.49 ± 0.068 | 0.11 ± 0.021      |

428 Table 2: For column 2-5 the term ( ± SE), SE stands for standard error calculated with bootstrapping using algorithm 1  
 429 and 2, concurrently. Spine head volume (SHV). Note that  $KL(P||U)/H(U)$  is equivalent to  $KL(P||U)/KL_{MAX}$ .

430  
431  
432  
433  
434  
435  
436  
437  
438  
439  
440  
441  
442  
443  
444  
445  
446  
447  
448  
449  
450  
451  
452  
453  
454  
455  
456  
457  
458  
459  
460  
461  
462  
463  
464  
465  
466  
467  
468  
469  
470  
471  
472  
473  
474  
475  
476

## Discussion

This paper introduces a new analytical approach for determining SISC that has several advantages over our prior approach (**Bartol et al., 2015**). The new method was used on data from area CA1 to compare it with the prior approach. It was then applied to track SISC changes in the dentate gyrus at 30 minutes and 2 hours following the induction of LTP. The analyses revealed that synaptic precision, based on covariance of spine head volume in SDSA pairs, was not altered during LTP. This finding suggests that as one spine of the pair enlarged (or shrank) following LTP, the other spine head changed in tandem. Note that SDSA pairs are independent synapses, but because they are driven by the same input they respond in a similar way and arrive at the same size due to the precision of the underlying mechanisms they each possess. We also found that the number of distinguishable synaptic strengths is increased during LTP by altering the range and frequency of spine head volumes in the distinguishable clusters. At 30 minutes following induction of LTP, spine head volumes shifted from the middle of the range both towards smaller and larger sizes. Thus, consistent with findings in CA1 in rat in **Bourne and Harris, 2011** DBS LTP induction triggered spinogenesis followed by loss of small excitatory synapses and a subsequent enlargement of the remaining synapses by 2 hr. These data suggest that dendritic segments of granule cells in the dentate gyrus coordinate their structural plasticity. Coordination occurs across the complete range of synapses and maintains a homeostatic balance of excitatory inputs. The mechanism for this coordination could involve local protein synthesis and selective capture or redistribution of dendritic resources, as were observed in CA1 in rat in **Bourne and Harris, 2011**.

We observed an increase in the number of bits from 2.0 bits in the control conditions for both time points to 3.0 bits after 30 min and 2.7 bits at 2 hr following induction of LTP. These outcomes were a consequence of two changes to the distribution of spine head sizes. First, there was an increase in both the larger and smaller spine head volumes, which broadened the size distributions. In addition, there was a change in the frequency of spine head volumes in each bin resulting in a more uniform distribution of spine head volumes. These changes brought the overall distribution of spine head volumes (**Fig. 6 C and D**) closer to the optimal distribution with maximum Shannon information (Table 2 column 5). This broadening in the size range was observed in both the 30 min and the 2 hr difference distributions. As a consequence, the information storage capacity was increased by around 50% following the LTP induction, an increase that was preserved between 30 min and 2 hr.

Moreover, there was also evidence for further reorganization of spine head volumes after 30 min. The KL divergence is a measure of the difference between two distributions; when applied to the distributions of spine head volumes and the maximal entropy uniform distribution, the value at 2 hr after LTP induction was half of that of 30 min following LTP induction relative to their controls, thereby using the range of spine head volume sizes more efficiently. This analysis suggests that after learning has taken place, underlying mechanisms continue to push the distribution of spine head volumes toward a more efficient storage of information at the population level.

## Advantages of the new SISC analysis

There are several advantages to the new SISC method for assessing the storage capacity of synapses. Signal detection theory (**Bartol et al., 2015**) assumed that the width of the Gaussian curves, based on the CV of the SDSA pairs, were distributed equally along the full range of sampled spine head volumes, without accounting for gaps in the distribution. Thus, the signal detection theoretical approach tended to overestimate the true number of distinct synaptic states because the distribution of the population was assumed to be continuous. In the new SISC analysis, the number of distinct synaptic states defined by the individual clusters converges toward the true number of states as the number of spine head volumes increases and the true shape of the distribution is sampled. A second advantage is that the full population of spine head volumes, not just the SDSA pairs, are included in the analysis, greatly improving the statistical power of the estimate. A third advantage is that there are no free parameters in the estimate, unlike signal detection theory where the degree of overlap of the Gaussians is a free parameter. A fourth advantage is that the new method is robust to the outliers. The largest spine head volume we found in an earlier data set (**Harris and Stevens, 1989**) in rat hippocampal area CA1 was 0.55 cubic microns. It is worth mentioning that by adding this one value to the 288 CA1 spine head volumes would result

477 in 25 distinguishable clusters, an increment of 1 state using SISC. Using the prior signal detection approach results in 39  
478 distinguishable Gaussians spanning the range, a 50% increase in the number of states. The previous method is not robust  
479 to outliers. Finally, the new method, based on information theory, allows access to the frequency of the clusters, making it  
480 possible to compute the entropy of the distinguishable synaptic strengths, the number of modes in the distribution, and any  
481 gaps in the range of functionally distinguishable synaptic strengths.

482 Our approach can be applied broadly to cluster these and other measures of synaptic efficacy in different brain regions  
483 and model organisms. Furthermore, the impact of other measures of synaptic plasticity can now be assessed reliably, such  
484 as changes in spine neck dimensions and pre- or postsynaptic dimensions and composition. In addition, it will be possible  
485 to determine how changes in the location or dimensions of key subcellular components, such as mitochondria, smooth  
486 endoplasmic reticulum, polyribosomes, endosomes, and perisynaptic astroglia, affect SISC. These opportunities to  
487 generalize SISC will surely result in greater understanding about the role of each component individually, and in concert,  
488 in determining normal synaptic weight and plasticity. Ultimately, the outcomes should give insight into how disrupted  
489 synapses result in cognitive decline during aging or as a consequence of neurological disorders.

### 490 **Information Theory of Synapses**

491 Information theory has been applied to analysis of spike trains (*Dayan, P. and Abbott, L.F., 2005*) but has not been used  
492 at the level of synaptic strength. We have shown that the amount of information represented by synaptic weights in neural  
493 circuits can be quantified by the distinguishability of synaptic weights. Here "distinguishability" fundamentally depends on  
494 the precision of the synaptic weights. When the precision of synaptic weights is low, the amount of information that can be  
495 stored in the ensemble of the neurons will also be low. Complete absence of precision implies a random process for setting  
496 synaptic weight and no information being stored at synapses. Because spine head volume is highly correlated with synapse  
497 size (*Bartol et al., 2015*), the precision of spine head volumes can be used to measure the distinguishability of the synaptic  
498 weights. High precision yields a greater number of distinguishable spine head volume clusters and hence higher information  
499 storage capacity. The number of distinguishable weights is not static but varies with the history of synaptic plasticity and is  
500 different in different parts of the brain. Thus, the amount of information that a population of synapses can store is not fixed  
501 but can be changed.

502 We made comparisons with the uniform distribution because it is the most conservative assumption when biological  
503 constraints (e.g. fixed values for the shape, mean, median, max, ...) on the spine head volume distribution are not known.  
504 In our mathematical setting when no constraint is applied (except the number of states being fixed) the uniform distribution  
505 has maximal entropy among every discrete distribution. This is why the uniform distribution for a fixed number of states is  
506 a "lower bound" on optimality and an upper bound for SISC. For example, we measured the entropy of the observed  
507 synaptic weight distribution in area CA1 based on the probability of the 24 distinguishable states as having a value of 4.1  
508 bits while the maximal entropy distribution when having 24 states is the uniform distribution with 4.59 bits of information.  
509 We used KL divergence analysis to measure the closeness of the spine head volume distributions to the maximum entropy  
510 distribution. What is remarkable here is while LTP does not change the number of spines, axons, or the summed synaptic  
511 area per unbiased length of dendrite in the dentate gyrus, the late phase of LTP pushes the distribution of distinguishable  
512 synaptic states closer to the upper bound of SISC given by the maximal entropy distribution.

513 If biological constraints were found at some point in the future, we could calculate the maximal entropy distribution under  
514 those constraints and measure the distance between the empirical distribution entropy (e.g., log normal) with the  
515 aforementioned maximal entropy distribution (with optimized parameters under those constraints). We can speculate that  
516 under those conditions the KL divergence would be even smaller. Because no biological constraint is known, we chose  
517 the universal maximal entropy discrete distribution as a reference frame to compare with and check optimality.

518 It is worth noting that synaptic activity and hence SISC are highly variable and change with an animal's behavior. This  
519 manuscript is only concerned with the optimality of information storage capacity based on the synaptic weight itself as the  
520 unit of storage of information. The question of how optimally synaptic activity is used to store working memories in neural  
521 circuits and how efficiently the synaptic weight is used in those codes is beyond the scope of this manuscript and is left for  
522 future research.

## 523 Mechanisms underlying the SISC Increase

524 Observations of increases and decreases in strength of synaptic potentials following LTP were determined using  
525 electrophysiology measurements. Our SISC analysis suggests that the changes in strength are due to increases in larger  
526 spines and smaller spine head sizes, which is consistent with observations based on light microscopy. In addition, we have  
527 observed decrease in CV among SDSA pairs (i.e., higher precision).

528 It should be noted that the increase in SISC via change in spine size has two principal contributing mechanisms rooted  
529 in broadening the range of spine head volumes. One is the increase in the largest spine head volumes due to LTP. But an  
530 equally important change is the concurrent and offsetting reduction in spine sizes in other synapses. In area CA1, a  
531 homeostatic mechanism was revealed where induction of LTP with saturating theta burst stimulation enlarged some  
532 synapses by 2 hr post induction, while stalling the outgrowth of small dendritic spines (**Bourne and Harris, 2011; Bell et al., 2014**). This effect resulted in a stable total summed synaptic weight per unit length of dendrite. Furthermore, the enlarged spine synapses also stabilized their neighboring smaller spines into efficient synaptic clusters (**Chrillo et al., 2019**). Thus, future analysis may reveal zones with high SISC and others with low SISC even along short segments of dendrite.

537 Here we further elaborate on the effect of LTD on the broadening of sizes. Particularly, concurrently induced  
538 “heterosynaptic” LTD has long been known to occur in the dentate gyrus perforant pathways (**Abraham & Goddard, 1983**)  
539 including after *in vivo* 400 Hz DBS as used in the current study (**Bowden et al., 2012**). We have shown in earlier works  
540 that this form of LTD is in fact activity-dependent, implying a reduction in the threshold such that either constitutive or  
541 evoked synaptic activity in the non-tetanized synapses becomes transiently capable of evoking the LTD (**Abraham et al., 2007**). **Jedlicka et al. (2015)** showed in a biophysically realistic compartmental granule cell model that this pattern of results can be accounted for by a voltage-based spike-timing-dependent plasticity (STDP) rule combined with a relatively fast Bienenstock-Cooper-Munro (BCM)-like homeostatic metaplasticity rule, all on a background of ongoing spontaneous activity in the input fibers. These results suggest that, at least for dentate granule cells, the interplay of STDP and BCM plasticity rules and ongoing pre- and postsynaptic background activity determines not only the degree of input-specific LTP elicited by various plasticity-inducing protocols, but also the degree of “associated LTD” in neighboring non-tetanized inputs, as generated by the ongoing constitutive activity at these synapses.

549 Furthermore, **Yang et al. (2008)**, after simultaneously monitoring EPSPs and dendritic spines using combined patch-clamp recording and two-photon time-lapse imaging in the same CA1 pyramidal neurons in acute hippocampal slices, showed that the initial expression of LTP and spine expansion are dissociable, but that there is a high degree of mechanistic overlap between the stabilization of structural plasticity and LTP. In our results, we showed that the coefficient of variation of spine head volumes (of the complete sample) of DG 30 min LTP (1.72) increased ~40% in comparison to DG 30 min Control (1.24) showing the extent of the expansion of spine head volumes. The CV value rested at 1.41 for the DG 2 hr LTP which is ~30 % higher than the DG 2hr Control (1.084).

556 These mechanisms thus could explain much of the broadening of the range of sizes which by itself would increase SISC.  
557 However, we also observed a consistent though non-significant decrease in CV of SDSA pairs, and this is a third  
558 mechanism that could contribute to the increase in SISC. As yet we do not have an explanation for the decrease in CV,  
559 and this remains a focus for future research. However, the strong DBS protocol for inducing LTP may have served to  
560 increase the coordinated activation histories of the SDSA pairs, leading to the CV reduction.

561

562

563

## 564 Comparison to Synapses in the Cerebral Cortex

565 We observed a low median CV (~0.1) among SDSA pairs in CA1 and a larger median CV (~0.6) in DG with no significant  
566 trend with spine head volume, but a large (~1 order of magnitude) variation from pair to pair. Thus, our results reveal that

567 CV among SDSA pairs differs across brain regions.

568 SDSA pairs are a type of "joint synapse," but note that joint synapses have a broader definition — namely, *multiple*  
569 *synapses* sharing the same pre- and postsynaptic *neurons*, not just the same axon and the same dendrite. Joint synapses  
570 with up to 7 shared synapses across the entire neuron have been found in other 3DEM studies (Dorkenwald et al., 2019),  
571 (Motta et al., 2019). A direct comparison of our study to these other studies is difficult to make due to multiple differences  
572 in experimental design. There are at least 8 major differences between our study and that of Motta et al. (2019): 1) choice  
573 of model organism (mouse vs. rat); 2) brain region (somatosensory cortex of mouse vs. CA1 and DG of rat hippocampus);  
574 3) measurement criterion (ASI vs. spine head volume); 4) connection type (joint synapses in general vs. SDSA pairs  
575 specifically); 5) sample size (thousands vs. tens); 6) measurement conditions (control only vs. control and LTP); 7) number  
576 of animals (1 vs. 3 in CA1 and 4 in DG); 8) analysis of measurement error (none vs. error estimation based on 4  
577 independent trials). There are a number of differences in how anatomical data was analyzed from the hippocampus and  
578 the cortex. First, the surface area of the axon-spine interface (ASI), not spine head volume, was measured in layer 4 of the  
579 somatosensory cortex (**Motta et al., 2019**). Motta et al. noted that saturating LTP or LTD could explain the lower CV (higher  
580 level of precision) which they observed among *joint synapses* with the largest or smallest ASI. Second, **Motta et al. (2019)**  
581 also observed higher CV among spines with intermediate sized ASI, which is inconsistent with our findings in **Fig. 4**.  
582 Perhaps this difference can be attributed to the possibility that ASI depends on aspects of synaptic function other than  
583 synaptic weight. Third, it is critical to point out that the measurement error needs to be smaller than the estimated synaptic  
584 plasticity precision (CV). **Motta et al. (2019)** neither explored the precision of synaptic plasticity nor the measurement error  
585 of ASI. Comparison of their study with ours will require further analysis of their data. Fourth, another important difference  
586 between the two studies is the experimental condition of the animal. **Motta et al. (2019)** stated in their abstract, "We  
587 quantified connectomic imprints consistent with Hebbian synaptic weight adaptation, which yielded upper bounds for the  
588 fraction of the circuit consistent with saturated long-term potentiation," assuming that synapses that had undergone  
589 saturated LTP were the synapses with low CV. However, the CVs of synapses in our CA1 data were equally precise for  
590 small spines as for large spines. Finally, comparison of our results in CA1 and DG revealed that: 1) different brain regions  
591 have different levels of precision and 2) within a region the precision level varies among SDSA pairs by over an order of  
592 magnitude within control and 30 min and 2 hr post LTP induction datasets (Fig. 4), but with no significant trend from the  
593 smallest to the largest spine head volume.

594 In another study of pyramidal neurons in cortical layer 2/3 (**Dorkenwald et al., 2019**), spine head volumes were similar  
595 among pairs that shared the same axon but were on different dendrites from the same cell. The distribution of spine head  
596 volumes in their sample had two broad peaks, suggesting that the populations of small and large synapses were distinct.  
597 Similarly, despite the small numbers, there may be two distinct peaks in our distribution of spine head volumes in area  
598 CA1. The frequency of small spines is much higher than larger spines. And small spines are generally more transient than  
599 the larger, typically more stable spines (**Holtmaat et al., 2009**). Indeed, in adult hippocampal area CA1, small spine  
600 outgrowth is stalled while synapses on the largest stable spines further enlarge following LTP (**Bell et al., 2014**), which is  
601 consistent with our observation of an increase in the frequency of large spines 2 hours after induction of LTP (**Fig. 2F**).

## 604 Conclusion

605 This paper explored the precision of synaptic plasticity and synaptic information storage capacity. Our methods and set of  
606 algorithms revealed new insights about information storage capacity at synaptic resolution. Information storage and coding  
607 in neural circuits has multiple substrates over a wide range of spatial and temporal scales. How information is coded, and  
608 its potential efficiency depends on how the information is stored. The synaptic weight is itself the information that is stored,  
609 and this information is retrieved by synaptic strength as assayed with test pulses. Here we measured the efficiency of  
610 information storage by analyzing the number of distinguishable categories for synaptic weights and the rearrangement of  
611 the spine sizes following LTP induction. The interplay of LTP and LTD plasticity rules after induction of our DBS protocol  
612 broadened the spine size range and reduced the CV. Based on comparing the distributions of synaptic weights and that of

613 a uniform weight distribution (the maximum entropy distribution), we found that LTP is highly efficient in storing information  
614 in synaptic weights across the distinguishable clusters. The weights continued to evolve over time towards a maximal  
615 entropy distribution, thereby optimally using the number of distinguishable clusters. From the perspective of information  
616 theory, this analysis has revealed a new way that the late phase of LTP may be involved in shifting the distribution of spine  
617 head volumes to achieve a more efficient use of coding space in the available synaptic population.

618

619

620

## 621 Methods and Materials

| Term                                    | Abbreviation  |
|-----------------------------------------|---------------|
| Synaptic Information Storage Capacity   | SISC          |
| Long-term Potentiation                  | LTP           |
| Postsynaptic Density                    | PSD           |
| Same Dendrite Same Axon                 | SDSA          |
| Coefficient of Variation                | CV            |
| Kullback-Leibler divergence             | KL divergence |
| field Excitatory Postsynaptic Potential | fEPSP         |
| Axon Spine Interface                    | ASI           |

625  
626  
627  
628 For the experiments done for the CA1 dataset, see the materials and methods section in **Bartol et al., 2015**. Here we  
629 present the details of experiments done for the 30 min and 2 hours post induction of LTP in 4 rats. Explanations are the  
630 modified version of 30 min control and LTP datasets published in **Bromer et al., 2018**.

### 631 632 Surgery and Electrophysiology (dentate gyrus)

633 The 30 min dataset was collected from two adult male Long-Evans rats aged 121 and 179 d at the time of LTP induction  
634 and perfusion. The 2 hour dataset was collected from two adult male Long-Evans rats aged 150 and 170 d at the time of  
635 LTP induction and perfusion. It is worth noting that the histograms in **Fig. 2A,D** and **Fig. 2B,E** are made for the combined  
636 datasets from the two 30 min datasets for control and LTP conditions, and the two 2 hour datasets for control and LTP  
637 conditions, respectively.

638 The animals were surgically implanted using stereotaxic coordinates as previously described in **Bowden et al., 2012**<sup>[CA1]</sup>  
639 with wire stimulating electrodes placed separately into the medial and lateral perforant pathways running in the angular  
640 bundle in the LTP hemisphere, and in only the medial perforant pathway in the control hemisphere due to the limited  
641 number of channels in the animal's head-plug connector and our primary interest in the medial path data which are  
642 described in this paper. Wire field excitatory postsynaptic potential (fEPSP) recording electrodes were implanted bilaterally  
643 in the dentate hilus. Two weeks after surgery, baseline recording sessions (30 min and 2 hours) commenced, with animals  
644 being in a quiet alert state during the animals' dark cycle. Test pulse stimuli were administered to each pathway as constant-  
645 current biphasic square-wave pulses (150  $\mu$ s half-wave duration) at a rate of 1/30 s, and alternating between the three  
646 stimulating electrodes. The test pulse stimulation intensity was set to evoke medial path waveforms with fEPSP slopes >  
647 3.5 mV/ms in association with population spike amplitudes between 2 and 4 mV, at a stimulation current  $\leq$  500  $\mu$ A. Paired-  
648 pulse and convergence tests were used to confirm successful stimulating placements in the MPP and LPP, as previously  
649 described in **Bowden et al., 2012**. On the day of LTP induction, after stable baseline recordings were achieved, animals  
650 received 30 min of test pulses followed by delta-burst stimulation delivered to the ipsilateral medial perforant path, while  
651 the contralateral hippocampus served as a control. The LTP-inducing delta-burst stimulation protocol consisted of five  
652 trains of 10 pulses (250  $\mu$ s half-wave duration at the same pulse amplitude as for the test pulses) delivered at 400 Hz at a



653 1 Hz interburst frequency, repeated 10 times at 1 min intervals (**Bowden et al., 2012**). Test pulse stimulation then resumed  
654 until the brains were obtained at 30 min and 2 hours after the onset of delta-burst stimulation. The initial slope of the medial  
655 path fEPSP was measured for each waveform and expressed as a percentage of the average response during the last 15  
656 min of recording before delta-burst stimulation.  
657

### 658 **Perfusion and Fixation (dentate gyrus)**

659 At 30 min or 2 hr after the commencement of delta-burst stimulation, animals were perfusion-fixed under halothane  
660 anesthesia and tracheal supply of oxygen (**Kuwajima et al., 2013**). The perfusion involved brief (~20 s) wash with  
661 oxygenated Krebs-Ringer Carbicarb buffer [concentration (in mM): 2.0 CaCl<sub>2</sub>, 11.0 D-glucose, 4.7 KCl, 4.0 MgSO<sub>4</sub>, 118  
662 NaCl, 12.5 Na<sub>2</sub>CO<sub>3</sub>, 12.5 NaHCO<sub>3</sub>; pH 7.4; osmolality, 300–330 mmol/kg], followed by fixative containing 2.0%  
663 formaldehyde, 2.5% glutaraldehyde (both aldehydes from Ladd Research), 2 mM CaCl<sub>2</sub>, and 4 mM MgSO<sub>4</sub> in 0.1 M  
664 cacodylate buffer (pH 7.4) for ~1 hr (~1,900 mL of fixative was used per animal). The brains were removed from the skull  
665 at about 1 hr after end of perfusion, wrapped in several layers of cotton gauze, and shipped on ice in the same fixative from  
666 the Abraham Laboratory in Dunedin, New Zealand, to the laboratory of K.M.H. in Austin, Texas by overnight delivery (TNT  
667 Holdings B.V.).  
668

### 669 **Tissue Processing and Serial Sectioning (dentate gyrus)**

670 The fixed tissue was then cut into parasagittal slices (70 μm thickness) with a vibrating blade microtome (Leica  
671 Microsystems) and processed for electron microscopy as described previously (**Kuwajima et al., 2013**), (**Harris et al.,**  
672 **2006**). Briefly, the tissue was treated with reduced osmium (1% osmium tetroxide and 1.5% potassium ferrocyanide in 0.1  
673 M cacodylate buffer) followed by microwave-assisted incubation in 1% osmium tetroxide under vacuum. Then the tissue  
674 underwent microwave-assisted dehydration and en bloc staining with 1% uranyl acetate in ascending concentrations of  
675 ethanol. The tissue was embedded into LX-112 epoxy resin (Ladd Research) at 60° C for 48 hr before being cut into series  
676 of ultrathin sections at the nominal thickness of 45 nm with a 35° diamond knife (DiATOME) on an ultramicrotome (Leica  
677 Microsystems). The serial ultrathin sections from MML (region of molecular layer ~125 μm from top of granule cell layer  
678 in dorsal blade of the hippocampal dentate gyrus) were collected onto Synaptek Be-Cu slot grids (Electron Microscopy  
679 Sciences or Ted Pella), coated with Pioloform (Ted Pella), and stained with a saturated aqueous solution of uranyl acetate  
680 followed by lead citrate (**Reynolds, 1963**).  
681  
682

## 683 **Imaging and Alignment (dentate gyrus)**

684  
685 “The serial ultrathin sections were imaged, blind as to condition, with either a JEOL JEM-1230 TEM or a transmission-  
686 mode scanning EM (tSEM) (Zeiss SUPRA 40 field-emission SEM with a retractable multimode transmitted electron detector  
687 and ATLAS package for large-field image acquisition; (**Kuwajima et al., 2013**)). On the TEM, sections were imaged in two-  
688 field mosaics at 5,000× magnification with a Gatan UltraScan 4000 CCD camera (4,080 pixels × 4,080 pixels), controlled  
689 by DigitalMicrograph software (Gatan). Mosaics were then stitched with the photomerge function in Adobe Photoshop. The  
690 serial TEM images were first manually aligned in Reconstruct (**Fiala JC., 2005**; [synapseweb.clm.utexas.edu/software- 0](http://synapseweb.clm.utexas.edu/software-0))  
691 and later in Fiji with the TrakEM2 plugin (refs. (**Fiala JC., 2005**; **Cardona A, et al., 2012**; **Schindelin J, et al., 2012**); [fiji.sc](http://fiji.sc)).  
692 On the tSEM, each section was imaged with the transmitted electron detector from a single field encompassing 32.768 μm  
693 × 32.768 μm (16,384 pixels × 16,384 pixels at 2 nm/pixel resolution). The scan beam was set for a dwell time of 1.25–1.4  
694 ms, with the accelerating voltage of 28 kV in high-current mode. Serial tSEM images were aligned automatically using Fiji  
695 with the TrakEM2 plugin. The images were aligned rigidly first, followed by application of affine and then elastic alignment.  
696 Images from a series were given a five letter code to mask the identity of experimental conditions in subsequent analyses  
697 with Reconstruct. Pixel size was calibrated for each series using the grating replica image that was acquired along with  
698 serial sections. The section thickness was estimated using the cylindrical diameters method (**Fiala et al., 2001**).” (**Bromer**  
699 **et al., 2018**)

## 700 **Unbiased Reconstructions and Identification of SDSA Pairs (dentate gyrus)**

701  
702  
703 Three dendrites of similar caliber were traced through serial sections from each of the two control and two LTP hemispheres  
704 for a total of six dendrites per condition (with a total of 24 dendrites for the 30 min and 2 hr datasets). Dendrite caliber  
705 previously has been shown to scale with dendrite cross-sectional area and microtubule count (**Harris et. al., 2022**). The  
706 microtubule count ranged from 30 to 35 and represents the average among all dendrites found in the MML of dentate gyrus.  
707 These dendritic segments ranged in length from 8.6 to 10.6 μm for the six control dendrites and 9.3 to 10.6 μm for the six  
708 LTP dendrites. All spines were identified visually by flickering between two images from the adjacent serial sections, to  
709 detect small changes in membrane curvature at the spine origins. This was repeated along the entire length of each  
710 sampled dendrite in the series.

711 Once identified, the spines were segmented by manually drawing closed contours along the plasma membrane (including  
712 spine head and neck) in each of the aligned images they appear. The spine contours were laid down to remove them at  
713 their origins from the dendritic shaft. The spine origin appears as an inflexion of the plasma membrane at the junction  
714 between spine neck and dendritic shaft, and this was visually confirmed both in 3D reconstructions and the underlying  
715 serial EM images.

716 In each spine, the PSD was identified by its electron density along the postsynaptic plasma membrane and the presence  
717 of small synaptic vesicles accumulating in the opposing presynaptic bouton. Closed contours were created to encapsulate  
718 the PSD and the presynaptic active zone. These contours crossed the postsynaptic plasma membrane perpendicularly to  
719 ensure that the correct area of the membrane surface mesh could be assigned as the PSD later in Blender (see below).

720 Both spine and PSD traces were curated by experts to ensure their accuracy. All manual segmentation and trace curation  
721 were done by experienced tracers who remained blind as to the experimental conditions (i.e., stimulation and layer  
722 location). A total of 209 spines were complete along the control dendrites and 188 spines were complete along the LTP  
723 dendrites. These were used for the indicated analyses. The unbiased dendritic segment analysis involved assessing the  
724 number of synapses, SDSAAs, and axons interacting with each dendritic segment. Beginning in the center of each of the 24  
725 dendrites, the presynaptic axons were traced past the nearest neighboring axonal bouton until they were determined to  
726 form synapses with the same dendrite or a different dendrite. Only the middle portion of the dendrite lengths could be used  
727 because only spines in the middle of the dendrite had presynaptic axons sufficiently complete within the series to determine  
728 their connectivity. In three cases, one axon made synapses with dendritic spines from two different dendrites in our sample,  
729 and these three were included for both dendritic segments. Each of the 24 dendrites (12 for 30 min and 12 for the 2 hr

730 datasets) was truncated to contain the central 15-20 spine and shaft synapses with known connectivity. The z-trace tool in  
731 Reconstruct was used to obtain the unbiased lengths spanning the origin of the first included spine to the origin of the first  
732 excluded spine (*Fiala et al., 2001*). The lengths ranged from 2.8 to 5.9  $\mu\text{m}$  for the six control dendrites and 3.1 to 6.1  $\mu\text{m}$   
733 for the six LTP dendrites. Then the number per micrometer length of dendrite was computed for spines, axons, and SDSAs.  
734 PSD areas were measured in Reconstruct according to the orientation in which they were sectioned (*Harris et al., 2015*).  
735 Perfectly cross-sectioned synapses had distinct presynaptic and postsynaptic membranes and synaptic cleft, and their  
736 areas were calculated by summing the product of PSD length and section thickness for each section spanned. En face  
737 synapses were cut parallel to the PSD surface, appeared in one section, and were measured as the enclosed area on that  
738 section. Obliquely sectioned PSDs were measured as the sum of the total cross-sectioned areas and total en face areas  
739 without overlap on adjacent sections. Then the synapse areas were summed along the truncated, unbiased dendritic length  
740 to compute values.

### 741 **Segmentation and Evaluation of Spines (dentate gyrus)**

742  
743 “Blender, a free, open-source, user-extensible computer graphics tool, was used in conjunction with 3D models generated  
744 in Reconstruct. We enhanced our Python add-on to Blender, Neuropil Tools (*Bartol et al., 2015*), with a new Processor  
745 Tool to facilitate the processing of the 3D reconstruction and evaluation of spines. The additions encompassed in Processor  
746 Tool were as follows:

- 747 i) The software allows for the selection of traced objects from Reconstruct (.ser) files by filter, allowing the user to select  
748 only desired contour traces (in this case spine head and PSD contours for three dendrites per series).
- 749 ii) At the press of a button, the tool generates 3D representations of selected contours in Blender. This step invokes  
750 functions from VolRoverN (*Edwards et al., 2014*) from within Blender to generate mesh objects by the addition of triangle  
751 faces between contour traces.
- 752 iii) Smoothing and evening of the surface of spine objects is accomplished with GAMer software ([fetk.org/codes/gamer/](http://fetk.org/codes/gamer/)).
- 753 iv) In a few cases, the formation of triangles was uneven and required additional manipulation by Blender tools and  
754 repeating of step iii before proceeding to step v.
- 755 v) Finally, the PSD areas are assigned as metadata (represented by red triangles) for the reconstructed spine heads.

756  
757 This assignment is performed based on the overlap of PSD and spine head contours (described above) in 3D space.  
758 Dendritic spines were segmented as previously described (*Bartol et al., 2015*) using the Neuropil Tools analyzer tool. We  
759 chose to measure spine volumes because at present they can be more accurately measured than other correlated metrics,  
760 synaptic area and vesicle number (*Bartol et al., 2015*). The edges of the synaptic contact areas are less precisely  
761 determined in oblique sections, and vesicles can be buried within the depth of a section or span two sections and hence  
762 are less reliably scored. The selection of spine head from spine neck and from spine neck to dendritic shaft were made  
763 using the same standardized criterion as before (visually identified as halfway along the concave arc as the head narrows  
764 to form the neck). Spines were excluded if they were clipped by the edge of the image dataset. To ensure the accuracy of  
765 the measurements, segmentation of the spine head volume was performed four times (twice each by two people) and  
766 averaged. A further check was added at this step, whereby spine heads with a  $CV \geq 0.02$  for all four measurements were  
767 visually evaluated by an expert, and any discrepancy in the segmentation was corrected. Interestingly, the only spines with  
768 a CV larger than 0.02 were in the LTP condition. We believe this occurs because the spines undergoing LTP are likely to  
769 be in transition at the 30 min time point, and as such the delineation between spine head and spine neck is more difficult  
770 to distinguish. In the two control condition series, further evaluation by an expert was performed, and adjustments were  
771 made accordingly (*Bromer et al., 2018*)” (Fig. 2 and Fig. S4 in (*Bromer et al., 2018*)).

### 772 773 774 775 **Code Availability**

776  
777 The data and codes used in the present study will be available in the following github link:

778 <https://github.com/MohammadSamavat>

779  
780 **Statistical Analysis**

781  
782 Statistical analysis and plots were generated using Python 3.4 with NumPy, SciPy, and Matplotlib. **Fig. 4** is made by R  
783 programming packages as follows: ggplot2, ggpubr, scales, xlsx, ggpmisc.

784 In order to show the empirical distribution of spine head volumes for the 4 dentate gyrus datasets, we illustrated the 4  
785 dentate gyrus spine head volume histograms in **Fig. 2**. For panel A-D the Y axis shows the frequency of spine head volumes  
786 within each of the bins and the X axis shows the bins start and end points. To get the bins' start and end points, the range  
787 of the 4 datasets were divided into 11 equal width bins (identical bins for all 4 dentate gyrus datasets) in logarithmic scale  
788 (Fig. 2 panel A-D).

789 We designed a statistical test based on nonparametric bootstrap hypothesis testing to see if the observed peaks and troughs  
790 of the trajectories in **Fig. 2E,F** are significant. To generate each of the 10,000 bootstrap samples we resampled the  
791 combined 4 DG dataset (n=862) with replacement and extracted DG 30 min control (n=209) and LTP (n=188) along with  
792 DG 2 hr control (n=239) and LTP (n=226). For each of the bootstrap samples we calculated the test statistic (summation of  
793 differences of frequencies) for all peaks and troughs. The p-value is calculated as the ratio of number of cases that the test  
794 statistics was as extreme as that of observed peaks and troughs of the empirical data over 10,000. The list of test statistics  
795 and p-values are shown in the following table.

796  
797  
798 Supplemental Table 1: P value of the observed peaks and troughs in Fig 2 E,F.

| statistics             | Observed value<br>(for SHV<median) | P-Value | Observed value (for<br>SHV>median) | P-Value |
|------------------------|------------------------------------|---------|------------------------------------|---------|
| sum(D - B)             | -15.6 %                            | 0.0015  | 16.1 %                             | 0.0006  |
| sum((D - C) - (B - A)) | -28.6 %                            | 0       | 29.1 %                             | 0       |
| sum(D - C)             | -13.1 %                            | 0.0025  | 13.15 %                            | 0.0021  |
| sum(B - A)             | 15.5 %                             | 0.0011  | 16.0 %                             | 0.0008  |

799 Supplemental Table 1: A=freq\_DG\_30min\_Control, B=freq\_DG\_30min\_LTP, C=freq\_DG\_2hr\_LTP, D=freq\_DG\_2hr\_Control.  
800 e.g. sum(D - B): It means we have first subtracted the frequencies of the 30 min LTP histogram from that of 2 hr LTP for each  
801 represented bin and then summed the differences (the other statistics are defined in the same way). Note: the P value 0 in row  
802 3 means in the 10,000 bootstrap samples there were no cases with summation of differences being as extreme as the observed  
803 value.

804  
805  
806 For the precision analysis we used the coefficient of variation (equation 1) as a metric to show the precision level by  
807 calculating the ratio of standard deviation (equation 2) over the mean of N joint synapses. Here N is 2 but can take higher  
808 values as up to 7 have been detected in previous studies. Since this is a sample from the unknown population of joint  
809 synapses, we used the corrected standard deviation formula with 1/(N-1) factor.

810 The coefficient of determination, denoted  $R^2$ , was used in Fig. 4 panel A-E to show the proportion of the variation in the  
811 dependent variable (CV) that is predictable from the independent variable (spine head volumes).

812 One factor Kruskal-Wallis (KW) test was in **Fig. 4 F** to check for a significant difference between the 4 dentate gyrus SDSA  
813 datasets and the CA1 dataset.

814 Logarithmic scale was used on skewed distributions (Fig. 2 A-F. Fig. 4, A-E. Fig. 5 B and C. Fig. 6 A-D.)

815 Boxplots in **Fig. 4 F** are made as follows: The lower and upper hinges correspond to the first and third quartiles (the 25th  
816 and 75th percentiles). The upper whisker extends from the hinge to the largest value no further than  $1.5 * \text{IQR}$  from the  
817 hinge (where IQR is the interquartile range, or distance between the first and third quartiles).

818 Bootstrapping was done by combining algorithms 1 and 2 to calculate the standard errors as explained below in the sections  
819 *Standard error of Median* and *Clustering Algorithm*.

820 The standard errors of the entropy, efficiency constant, maximum entropy for uniform distribution, and KL divergence (Table  
821 2 column 2-5) are all calculated similarly using the bootstrapping technique explained in algorithm 1. (See (**Efron et al.,**  
822 **2021**) for further information regarding bootstrapping for the calculation of standard error.)

### 823 **Standard error of Median**

824 The standard error of median for the precision levels of each of the 5 datasets' SDSA pairs is calculated with Algorithm 1 as  
825 follows. The idea is to generate 1000 bootstrap samples of length  $n$ , each sampled from the  $n$  SDSA pairs with replacement, to  
826 estimate the standard error of median for the  $n$  SDSA pairs (Table 1, column 3). The standard error of median of spine head  
827 volumes follows the same procedure using Algorithm 1.

828

829

---

#### **Algorithm 1** Bootstrap Algorithm for Estimating the Standard Error of Median

---

**Require:**  $n \geq 1$

Let  $X_1, \dots, X_n$  be some data and  $\hat{\theta}_n = t(X_1, \dots, X_n)$

For  $b = 1, \dots, B$

Simulate  $X_1^{*(b)}, \dots, X_n^{*(b)} \stackrel{\text{iid}}{\sim} F_n$  by sampling with replacement from  $\{X_1, \dots, X_n\}$

Evaluate  $\hat{\theta}_n^{*(b)} = t(X_1^{*(b)}, \dots, X_n^{*(b)})$

$$\hat{\sigma}_{n,B}^2 = \frac{1}{B} \sum_{b=1}^B \left( \hat{\theta}_n^{*(b)} - \frac{1}{B} \sum_{b=1}^B \hat{\theta}_n^{*(b)} \right)^2$$

Return the bootstrap estimate of standard error of median

$$\hat{\sigma}_{n,B}$$

---

830

## 831 Clustering Algorithm

832 To construct the clusters, spine head volumes are sorted from smallest to the largest. The first value (smallest value) is  
833 selected and the CV of that value and the remaining head volumes are calculated in a pairwise manner. The head volumes  
834 for which the calculated CV is below the threshold (the median value of the SDSA pairs CV) are assigned to the first  
835 category and deleted from the pool of  $N$  spine head volumes. This procedure is repeated until the CV exceeds the median  
836 SDSA pairs CV and a new category is formed. New categories are formed until all the remaining spine head volumes are  
837 assigned to a category and the original vector of spine head volumes is empty (see Algorithm 2 for details). It is guaranteed  
838 that the coefficient of variation between each random pair within each category is less than the threshold value measured  
839 from the reconstructed tissue SDSA pairs. All spine head volumes are rounded to two significant digits for the display.

840

841

842

843

844

845

846

847

848

849

850

851

852

853

854

855

856

857

858

859

860

861

862

863

864

865

866

867

868

869

870

### Algorithm 2 Clustering Algorithm

---

```
1: function Precision Calculation (Same Dendrite Same Axon pairs (SDSA),  $N$  pairs (a,b) of spine  
head volumes)  
2:   for  $a, b \in SDSA[i] \ i=1:N$  do  
3:    $cv = \sigma(a,b) / \mu(a,b)$   
4:    $cv[i] = cv$   
5:   end for  
6:   return {Precision_Level=Median( $cv$ )}  
7: end function  
8: function Clustering spine head volumes ( $shv$  vector)  
9:   Sort  $shv$  s.t.  $shv[i] < shv[i + 1]$   
10:   $L = Length(shv)$   
11:   $List\_of\_shcluster = NULL$   
12:  while  $Length(shv) \neq 0$  do  $\triangleright$  Here we do the clustering with the median value of  
SDSA pairs calculated with the above function.  
13:     $a = shv[1]$   
14:    for every  $b \in shv[k]$  where  $K=2:L$  do  
15:       $Cluster = [shv[1]]$  (add the smallest spine head volume of  $shv$  to cluster vector)  
16:      if  $cv(a, b) < Median(CV)$  then  
17:         $Cluster \leftarrow b$   
18:      end if  
19:    end for  
20:     $List\_of\_shcluster[j] \leftarrow Cluster$   
21:     $shv = shv [-Cluster]$  (deleting the spine head volumes of cluster  $j$  from the  $shv$  vector)  
22:     $j=j+1$   
23:  end while  
24:  return { $List\_of\_shcluster, N_c = j-1$ } (List of clusters and number of clusters, respectively)  
25: end function
```

---

871

872 For each panel in Fig. 6, the Y axis shows the percentage of spine head volume counts in the respective bin. The area  
873 under each plot is normalized to 1 for a fair comparison. The X axis shows the spine head volumes in  $\mu m^3$  on the log scale.  
874 The width of each bin is exactly the median value of the set of CV values for each condition calculated in Fig. 5 (Example:  
875 for bin-1 panel-1 [x1,x2],  $CV(x1,x2)=0.65$ , where x1 is the smallest spine head volume in dentate gyrus 30 min control  
876 dataset and x2 is a larger hypothetical head volume that has a CV of 0.65 with x1). The height of bin 1 is the number of  
877 spine head volumes in that range normalized to the total number of spine head volumes in that dataset (Example: for Fig.  
878 6A for dentate gyrus 30 min control it is 236). (A) dentate gyrus 30 min control. (B) dentate gyrus 2hr LTP. (C) dentate  
879 gyrus 30 min LTP. (D) dentate gyrus 2hr LTP.

880

## 881 **Information and Entropy in Synaptic Plasticity**

882 “The fundamental problem of communication is that of reproducing at one point either exactly or approximately a message  
883 selected at another point. Frequently the messages have meaning; that is they refer to or are correlated according to some  
884 system with certain physical or conceptual entities. These semantic aspects of communication are irrelevant to the  
885 engineering problem. The significant aspect is that the actual message is one selected from a set of possible messages.  
886 The system must be designed to operate for each possible selection, not just the one which will actually be chosen since  
887 this is unknown at the time of design.” (Shannon, 1948)

888

889 Shannon’s information theory is the rigorous basis for a new method to quantify empirically SISC; that is, the number of  
890 bits of Shannon entropy stored per synapse. For this new method, only the precision as measured by the coefficient of  
891 variation (CV) of SDSA pairs, illustrated in Fig. 4, was borrowed from Bartol et al. (2015). The new method performs non-  
892 overlapping cluster analysis (Fig. 5 and 6) using Algorithm 2, to obtain the number of distinguishable categories of spine  
893 head volumes from the CV measured across the reconstructed dendrites.

894

895 The Shannon information per synapse is calculated by using the frequency of spine head volumes in the distinguishable  
896 categories where each category is a different message for the calculation of Shannon information. The maximum number  
897 of bits is calculated as the  $\log_2(N_c)$  where  $N_c$  is the number of categories which set an upper bound for the SISC.

898

899 When calculating the amount of entropy per synapse, the random variable is the synapse size and the number of  
900 distinguishable synaptic states is the realization of a random variable for the occurrence of each state. The probability of  
901 the occurrences of each state is calculated by the fraction of the number of spine head volumes in each of the clusters  
902 over the total number of spine head volumes in the reconstructed volume.

903

904 The information coding efficiency at synapses is measured by Kullback-Leibler (KL) divergence to quantify the difference  
905 between two probability distributions, one from the categories of spine head volumes and the other from a corresponding  
906 uniform distribution with the same number of categories.

907

## 908 **Synaptic Information Storage Capacity**

909

910 Spine morphology has substantial variation across the population and lifetime of synapses. Hebbian plasticity puts forth a  
911 causal relationship and transformation of information from the presynaptic site to the postsynaptic site by the adjustment  
912 of efficacy of synaptic transmission, or "synaptic weight." The pattern of synaptic weights in the ensemble of neural circuits  
913 allows us to define both information and the recipient of the message in the context of synaptic plasticity. The recipient of  
914 the message is the neural ensemble or the pattern of synaptic weights that store the message and read the message  
915 during the recall process, which is the reactivation of the synaptic weights in the memory trace. The amount of information  
916 is quantified by the distinguishability of synaptic weights which comprise the memory trace. Here "distinguishability" implies  
917 that the precision of synaptic weights play a significant role.

918

919

920

921

922

923

The synapse is the unit of information storage in an ensemble of neurons, and if the precision level of synaptic weights is low then the amount of information that can be stored per synapse and in the ensemble of the neurons will also be low. Because the spine head volume is highly correlated with synapse size, the precision of spine head volumes can be used to measure the distinguishability of the synaptic weights. High precision yields a greater number of distinguishable categories (i.e., states or clusters) for spine head volumes and hence higher information storage capacity.



924

## 925 Acknowledgments

926 We would like to acknowledge Adel Aghajan and Wenxin Zhou for helpful discussion regarding information theory and  
927 bootstrapping analysis and Patrick Parker for editorial support. This research was supported by NSF 170756; NSF  
928 2014862; NIH P41GM103712; NIH R01 - NIH MH095980-07; NIH MH115556; NIH MH129066.

929

## 930 Author contributions

931 M.S., T.M.B., W.C.A., K.M.H., and T.J.S. designed research; M.S., T.M.B., W.C.A., K.M.H., and T.J.S., analyzed data; M.S.,  
932 designed and implemented all simulation algorithms and generated results for the manuscript and applied the information theory  
933 to the analyses with contributions from T.M.B., W.C.A., K.M.H. and T.J.S.; M.S., T.M.B., J.B.B., D.D.H., D.C.H., P.V.G., M.K.,  
934 J.M.M., P.H.P., W.C.A., K.M.H., and T.J.S. performed research; J.B.B., M.K., J.M.M., W.C.A., and K.M.H. designed and  
935 performed the electrophysiology experiments, tissue processing, and imaging; M.S., C.B., J.B.B., D.D.H., D.C.H., P.V.G., M.K.,  
936 P.H.P., and K.M.H. performed, curated reconstructions; M.K. and D.D.H. made materials for Fig. 1; M.S. and T.J.S. wrote the  
937 paper with contributions from T.M.B., W.C.A., K.M.H. This research is part of multi-institutional collaboration project NeuroNex  
938 1 & 2 led by K.M.H.

939

## 940 References

941

942 **Bartol TM**, Bromer C, Kinney J, Chirillo MA, Bourne JN, Harris KM, Sejnowski TJ. Nanoconnectomic upper bound on the  
943 variability of synaptic plasticity. *Elife*. 2015; 4:e10778.

944 **Bowden JB**, Abraham WC, Harris KM. Differential effects of strain, circadian cycle, and stimulation pattern on LTP and  
945 concurrent LTD in the dentate gyrus of freely moving rats. *Hippocampus*. 2012; 22(6):1363–1370.

946 **Bromer C**, Bartol TM, Bowden JB, Hubbard DD, Hanka DC, Gonzalez PV, Kuwajima M, Mendenhall JM, Parker PH,  
947 Abraham WC, et al. Long-term potentiation expands information content of hippocampal dentate gyrus synapses.  
948 *Proceedings of the National Academy of Sciences*. 2018; 115(10):E2410–E2418.

949 **Buchs PA**, Muller D. Induction of long-term potentiation is associated with major ultrastructural changes of activated  
950 synapses. *Proceedings of the National Academy of Sciences*. 1996; 93(15):8040–8045.

951 **Ramón y Cajal S**. The Croonian lecture.—La fine structure des centres nerveux. *Proceedings of the Royal Society of*  
952 *London*. 1894; 55(331-335):444–468.

953 **Dorkenwald S**, Turner NL, Macrina T, Lee K, Lu R, Wu J, Bodor AL, Bleckert AA, Brittain D, Kemnitz N, et al. Binary and  
954 analog variation of synapses between cortical pyramidal neurons. *bioRxiv*. 2019; .

955 **Harris KM**, Stevens JK. Dendritic spines of CA 1 pyramidal cells in the rat hippocampus: serial electron mi- croscopy with  
956 reference to their biophysical characteristics. *Journal of Neuroscience*. 1989; 9(8):2982–2997.

957 **Kuwajima M**, Mendenhall JM, Harris KM (2013) Large-volume reconstruction of brain tissue from high-resolution serial  
958 section images acquired by SEM-based scanning transmission electron microscopy. *Methods Mol Biol* 950:253–273.

959 **Harris KM**, et al. (2006) Uniform serial sectioning for transmission electron microscopy. *J Neurosci* 26:12101–12103.

960 **Jedlicka, P.**, Benuskova, L. and Abraham, W.C., 2015. A voltage-based STDP rule combined with fast BCM-like  
961 metaplasticity accounts for LTP and concurrent “heterosynaptic” LTD in the dentate gyrus in vivo. *PLoS computational*  
962 *biology*, 11(11), p.e1004588.

963 **Reynolds ES** (1963) The use of lead citrate at high pH as an electron-opaque stain in electron microscopy. *J Cell Biol*  
964 17:208–212.

965 **Klyachko, V.A.** and Stevens, C.F., 2006. Temperature-dependent shift of balance among the components of short-term

- 966 plasticity in hippocampal synapses. *Journal of Neuroscience*, 26(26), pp.6945-6957.
- 967 **Kandaswamy, U.**, Deng, P.Y., Stevens, C.F. and Klyachko, V.A., 2010. The role of presynaptic dynamics in processing of  
968 natural spike trains in hippocampal synapses. *Journal of Neuroscience*, 30(47), pp.15904-15914.
- 969 **Fiala JC** (2005) Reconstruct: A free editor for serial section microscopy. *J Microsc* 218: 52–61. 48.
- 970 **Cardona A**, et al. (2012) TrakEM2 software for neural circuit reconstruction. *PLoS One* 7:e38011.
- 971 **Saalfeld S**, Fetter R, Cardona A, Tomancak P (2012) Elastic volume reconstruction from series of ultra-thin microscopy  
972 sections. *Nat Methods* 9:717–720.
- 973 **Schindelin J**, et al. (2012) Fiji: An open-source platform for biological-image analysis. *Nat Methods* 9:676–682.
- 974 **Fiala JC**, Harris KM (2001) Cylindrical diameters method for calibrating section thickness in serial electron microscopy. *J*  
975 *Microsc* 202:468–472.
- 976 **Bell, M.E.**, Bourne, J.N., Chirillo, M.A., Mendenhall, J.M., Kuwajima, M. and Harris, K.M., 2014. Dynamics of nascent and  
977 active zone ultrastructure as synapses enlarge during long-term potentiation in mature hippocampus. *Journal of*  
978 *Comparative Neurology*, 522(17), pp.3861-3884.
- 979 **Bourne JN**, Harris KM (2011) Coordination of size and number of excitatory and inhibitory synapses results in a balanced  
980 structural plasticity along mature hippocampal CA1 dendrites during LTP. *Hippocampus* 21:354–373.
- 981 **Fiala JC**, et al. (2003) Timing of neuronal and glial ultrastructure disruption during brain slice preparation and recovery in  
982 vitro. *J Comp Neurol* 465:90–103.
- 983 **Bowden JB**, Mendenhall JM, Abraham WC, Harris KM (2008) Microtubule number as a correlate of dendritic spine density  
984 in dentate granule cells. *Soc Neurosci Abstr* 34: 636.20. 54.
- 985 **Fiala JC**, Harris KM (2001) Extending unbiased stereology of brain ultrastructure to three-dimensional volumes. *J Am Med*  
986 *Inform Assoc* 8:1–16.
- 987 **Edwards J**, et al. (2014) VolRoverN: Enhancing surface and volumetric reconstruction for realistic dynamical simulation of  
988 cellular and subcellular function. *Neuroinformatics* 12: 277–289.
- 989
- 990 **Jung JH**, Kirk LM, Bourne JN, Harris KM. Shortened tethering filaments stabilize presynaptic vesicles in support of  
991 elevated release probability during LTP in rat hippocampus. *Proceedings of the National Academy of Sciences*. 2021;  
992 118(17).
- 993 **Kasai H**, Ziv NE, Okazaki H, Yagishita S, Toyozumi T. Spine dynamics in the brain, mental disorders and artificial neural  
994 networks. *Nature Reviews Neuroscience*. 2021; 22(7):407–422.
- 995 **Motta A**, Berning M, Boergens KM, Staffler B, Beining M, Loomba S, Hennig P, Wissler H, Helmstaedter M. Dense  
996 connectomic reconstruction in layer 4 of the somatosensory cortex. *Science*. 2019; 366(6469).
- 997 **Schultz SR**. Signal-to-noise ratio in neuroscience. *Scholarpedia*. 2007; 2(6):2046.
- 998 **Harvey, C.D.** and Svoboda, K., 2007. Locally dynamic synaptic learning rules in pyramidal neuron dendrites. *Nature*,  
999 450(7173), pp.1195-1200.
- 000 **Yang, Y.** and Liu, J.J., 2022. Structural LTP: Signal transduction, actin cytoskeleton reorganization, and membrane  
001 remodeling of dendritic spines. *Current Opinion in Neurobiology*, 74, p.102534.
- 002 **Saxe, M.D.**, Battaglia, F., Wang, J.W., Malleret, G., David, D.J., Monckton, J.E., Garcia, A.D.R., Sofroniew, M.V., Kandel,  
003 E.R., Santarelli, L. and Hen, R., 2006. Ablation of hippocampal neurogenesis impairs contextual fear conditioning and  
004 synaptic plasticity in the dentate gyrus. *Proceedings of the National Academy of Sciences*, 103(46), pp.17501-17506.
- 005 **Snyder, J.S.**, Kee, N. and Wojtowicz, J.M., 2001. Effects of adult neurogenesis on synaptic plasticity in the rat dentate

- 006 gyrus. *Journal of neurophysiology*, 85(6), pp.2423-2431.
- 007 **Lopez-Rojas, J.**, Heine, M. and Kreutz, M.R., 2016. Plasticity of intrinsic excitability in mature granule cells of the dentate  
008 gyrus. *Scientific reports*, 6(1), pp.1-12.
- 009 **Krueppel, R.**, Remy, S. and Beck, H., 2011. Dendritic integration in hippocampal dentate granule cells. *Neuron*, 71(3),  
010 pp.512-528.
- 011 **Harris, K.M.**, 2020. Structural LTP: from synaptogenesis to regulated synapse enlargement and clustering. *Current opinion*  
012 *in neurobiology*, 63, pp.189-197.
- 013 **Kuwajima, M.**, Mendenhall, J.M., Lindsey, L.F. and Harris, K.M., 2013. Automated transmission-mode scanning electron  
014 microscopy (tSEM) for large volume analysis at nanoscale resolution. *PLoS One*, 8(3), p.e59573.
- 015 **Harris, K.M.**, Hubbard, D.D., Kuwajima, M., Abraham, W.C., Bourne, J.N., Bowden, J.B., Haessly, A., Mendenhall, J.M.,  
016 Parker, P.H., Shi, B. and Spacek, J., 2022. Dendritic Spine Density Scales with Microtubule Number in Rat Hippocampal  
017 Dendrites. *Neuroscience*, 489, pp.84-97.
- 018 **Harris, K.M.**, Spacek, J., Bell, M.E., Parker, P.H., Lindsey, L.F., Baden, A.D., Vogelstein, J.T. and Burns, R., 2015. A  
019 resource from 3D electron microscopy of hippocampal neuropil for user training and tool development. *Scientific data*, 2(1),  
020 pp.1-19.
- 021 **Efron, B.** and Hastie, T., 2021. *Computer Age Statistical Inference, Student Edition: Algorithms, Evidence, and Data*  
022 *Science* (Vol. 6). Cambridge University Press.
- 023
- 024 **Abraham, W.C.**, & Goddard, G.V. (1983). Asymmetric relations between homosynaptic long-term potentiation and  
025 heterosynaptic long-term depression. *Nature*, 305, 717-719.
- 026 **Abraham, W.C.** and Goddard, G.V., 1983. Asymmetric relationships between homosynaptic long-term potentiation and  
027 heterosynaptic long-term depression. *Nature*, 305(5936), pp.717-719.
- 028 **Abraham, W.C.**, Logan, B., Wolff, A. and Benuskova, L., 2007. "Heterosynaptic" LTD in the dentate gyrus of anesthetized rat  
029 requires homosynaptic activity. *Journal of neurophysiology*, 98(2), pp.1048-1051.
- 030 **Jedlicka, P.**, Benuskova, L. and Abraham, W.C., 2015. A voltage-based STDP rule combined with fast BCM-like  
031 metaplasticity accounts for LTP and concurrent "heterosynaptic" LTD in the dentate gyrus in vivo. *PLoS computational biology*,  
032 11(11), p.e1004588.
- 033 **Matsuzaki, M.**, Honkura, N., Ellis-Davies, G.C. and Kasai, H., 2004. Structural basis of long-term potentiation in single  
034 dendritic spines. *Nature*, 429(6993), pp.761-766.
- 035 **Yang, Y.**, Wang, X.B., Frerking, M. and Zhou, Q., 2008. Spine expansion and stabilization associated with long-term  
036 potentiation. *Journal of Neuroscience*, 28(22), pp.5740-5751.
- 037 **Bourne, J.N.** and Harris, K.M., 2011. Coordination of size and number of excitatory and inhibitory synapses results in a  
038 balanced structural plasticity along mature hippocampal CA1 dendrites during LTP. *Hippocampus*, 21(4), pp.354-373.
- 039

Table 3: Per-animal analysis of SDC

| Time points                                    | 30 min      |             |             |             | 2 hours    |            |             |             |
|------------------------------------------------|-------------|-------------|-------------|-------------|------------|------------|-------------|-------------|
|                                                | Animal 1    |             | Animal 2    |             | Animal 3   |            | Animal 4    |             |
| Animal #                                       |             |             |             |             |            |            |             |             |
| Weight (gr)                                    | 623         |             | 448         |             | 648        |            | 490         |             |
| age (postnatal day)                            | 179         |             | 121         |             | 170        |            | 150         |             |
| time of delta-burst stimulation                | 10:30 am    |             | 10:30 am    |             | 09:30 am   |            | 09:30 am    |             |
| circadian cycle at delta-burst stimulation     | dark        |             | dark        |             | dark       |            | dark        |             |
| animal ID                                      | LED50       |             | LED56       |             | LE108      |            | LE113       |             |
| Condition                                      | control     | LTP         | control     | LTP         | control    | LTP        | control     | LTP         |
| Series code                                    | CLZBJ       | TNKPS       | NDKZB       | MFBCF       | JHHZS      | HLWLQ      | KSGRS       | BBCHZ       |
| mean fEPSP 5 min pre-delta-burst stimulation % | -3.84       | -3.81       | 3.16        | 2.81        | -2.36      | 0.04       | 0.65        | -2.53       |
| mean fEPSP last 5 min %                        | -5.38       | 33.61       | 5.28        | 48.33       | -4.76      | 40.68      | -1.10       | 34.45       |
| # SDSA pairs                                   | 6           | 4           | 4           | 4           | 10         | 4          | 8           | 6           |
| SDSA Scale factor                              | 30          | 7           | 8           | 29          | 26         | 7          | 12          | 107         |
| SDSA Median CV                                 | 0.65        | 0.31        | 0.71        | 0.76        | 0.44       | 0.42       | 0.63        | 0.38        |
| # spine head volumes                           | 130         | 110         | 79          | 78          | 112        | 111        | 127         | 115         |
| spine head volume Scale factor                 | 57          | 147         | 64          | 158         | 49         | 110        | 110         | 141         |
| # Clusters for spine head volumes              | 5           | 11          | 4           | 5           | 6          | 8          | 5           | 9           |
| Entropy                                        | 1.97        | 3.1         | 1.77        | 1.93        | 2.16       | 2.68       | 1.92        | 2.89        |
| KL divergence                                  | 0.35        | 0.36        | 0.23        | 0.40        | 0.43       | 0.32       | 0.41        | 0.28        |
| # Clusters (Bootstrapping)                     | 4 ± 0.47    | 10 ± 0.55   | 4 ± 0.39    | 4 ± 0.5     | 6 ± 0.38   | 7 ± 0.71   | 5 ± 0.38    | 8 ± 0.6     |
| Entropy (Bootstrapping)                        | 1.97 ± 0.06 | 3.1 ± 0.1   | 1.7 ± 0.13  | 1.93 ± 0.1  | 2.16 ± 0.1 | 2.68 ± 0.1 | 1.86 ± 0.1  | 2.89 ± 0.1  |
| KL divergence (Bootstrapping)                  | 0.14 ± 0.12 | 0.31 ± 0.09 | 0.24 ± 0.12 | 0.27 ± 0.13 | 0.46 ± 0.1 | 0.27 ± 0.1 | 0.42 ± 0.12 | 0.31 ± 0.08 |

Table 3: For columns with the term ( ± SE), SE stands for standard error calculated with bootstrapping using algorithm 1 and 2, concurrently.

050  
051  
052  
053  
054  
055  
  
056  
  
057  
  
058  
  
059  
  
060  
  
061  
  
062  
  
063  
  
064  
  
065  
  
066  
  
067  
  
068  
  
069  
  
070  
  
071  
  
072  
  
073  
  
074  
  
075  
  
076

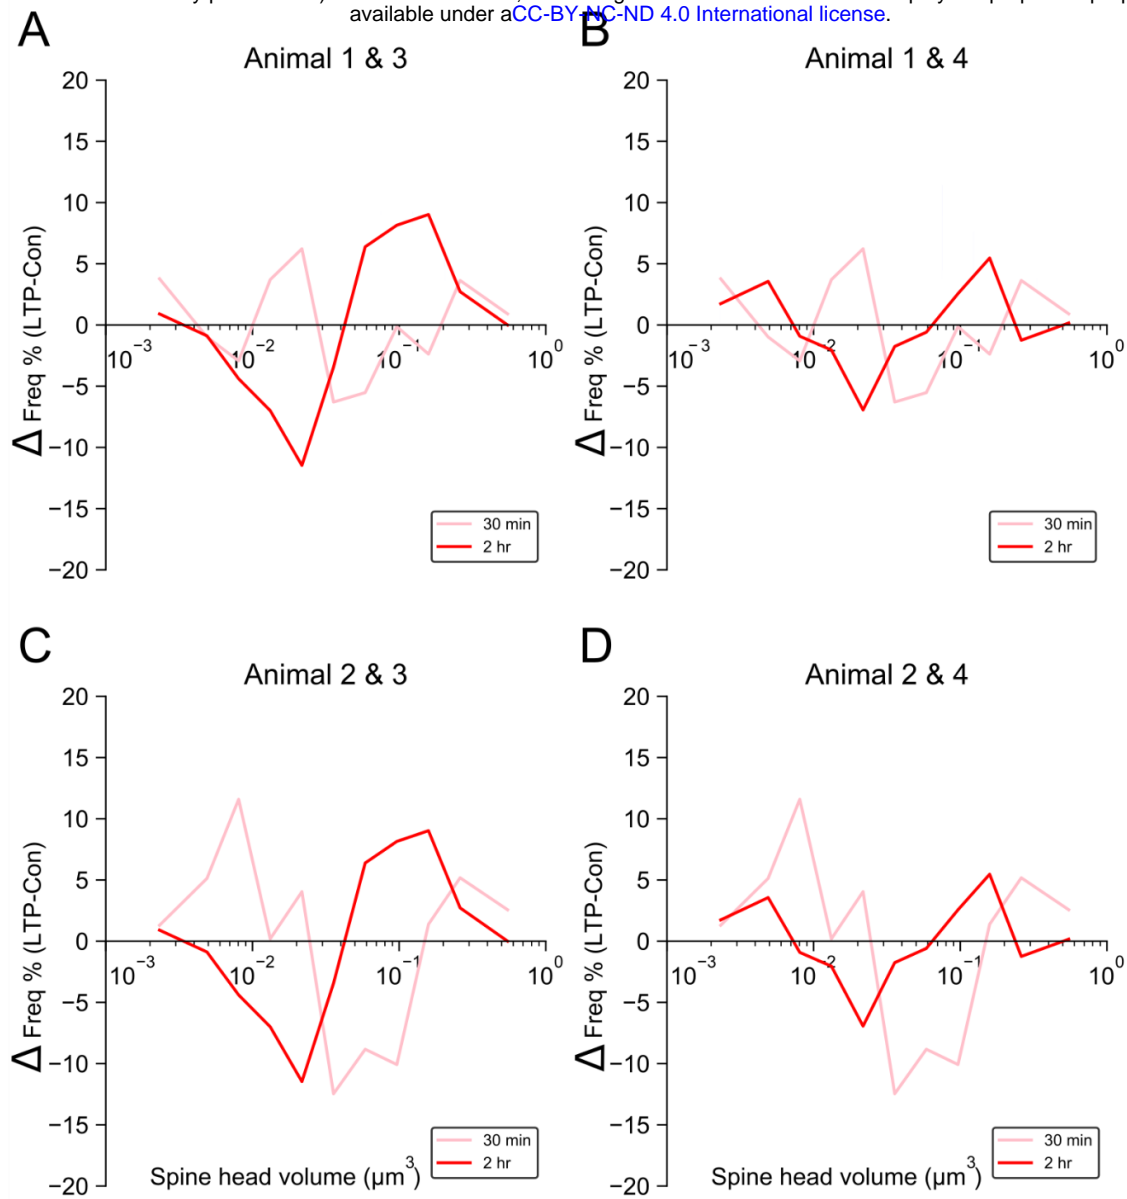

077

078 **Supplementary Fig 1.**

079 Change relative to control hemispheres in the distribution of spine head volumes at 30 min and 2 hr after the induction of LTP  
080 per animal. Difference between the frequency of spine head volumes in 30 min LTP and 2 hr LTP conditions. (A) Animal 1 &  
081 3 (B) Animal 1 & 4 (C) Animal 2 & 3 (D) Animal 2 & 4.

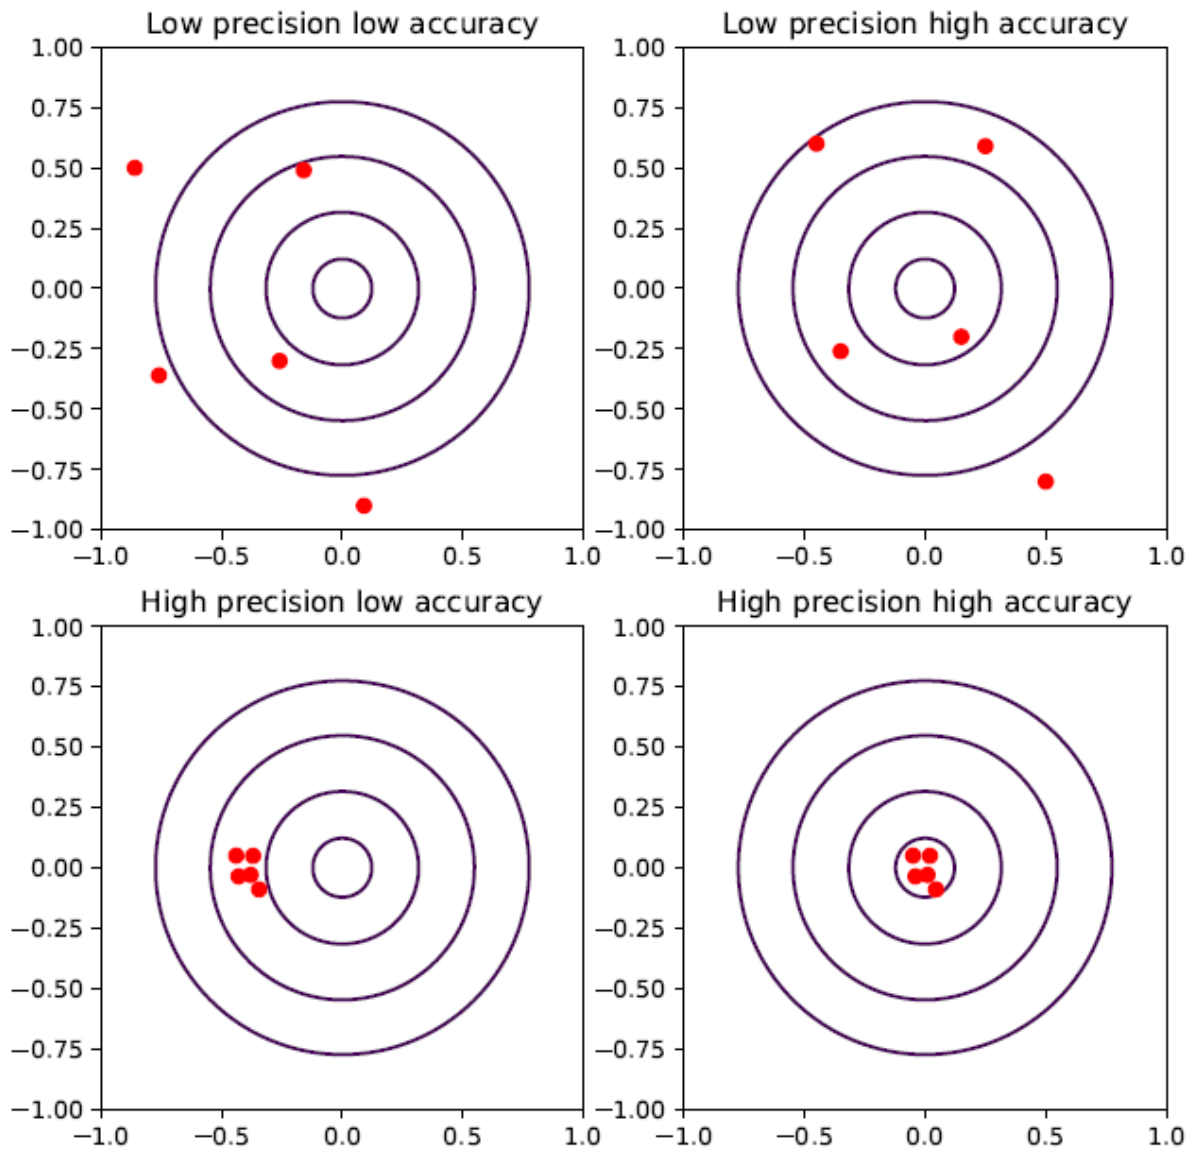

082

083

**Supplementary Fig 2.**

084

Dart precision versus accuracy. Precision concerns the degree of reproducibility of a process. When a process or system is repeated with the same input the amount of variation in the output shows the precision level of the process. For accuracy there is a reference frame with which the average value of measurements is compared. The graphs illustrate a low precision and low accuracy outcome (top left), low precision and high accuracy (top right; the average of the positions is almost on the bull's eye), high precision and low accuracy (bottom left), and high precision and high accuracy (bottom right).

089

090

091

092

093

094

095

096

097  
098  
099  
100  
101  
102  
103  
104  
105

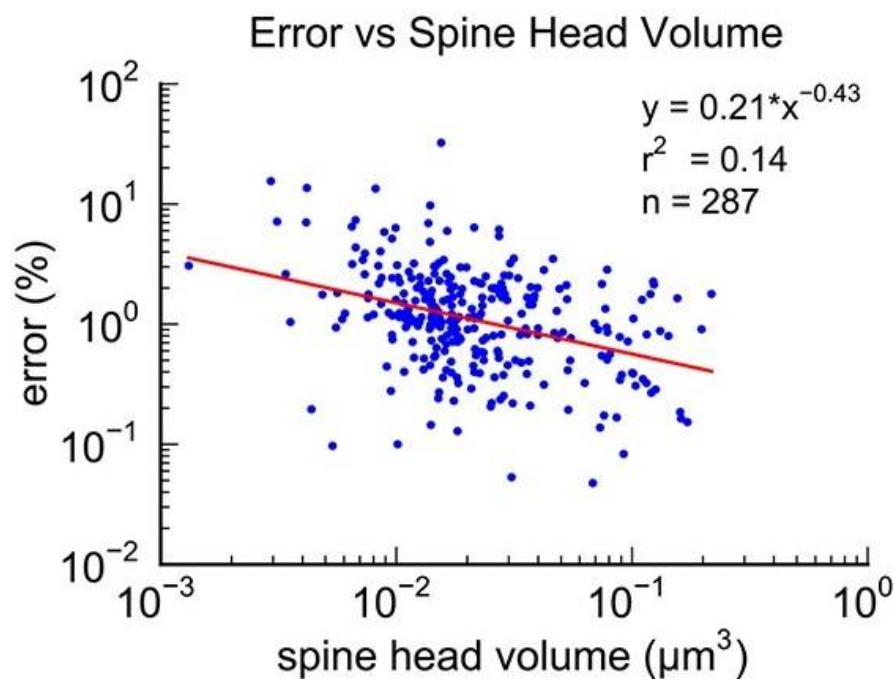

106  
107

### Supplementary Fig 3.

The 3D reconstructions of the spine head volumes of the 5 datasets were performed with the same protocol as that used for the CA1 dataset in *Bartol et al., eLife, (2015)*. Four individuals made hand tracings from the 2 dimensional electron micrographs and then after alignment the automatic 3D reconstruction was made. The average measurement error is about 0.01 as shown in the above figure.

113  
114  
115  
116  
117  
118  
119  
120



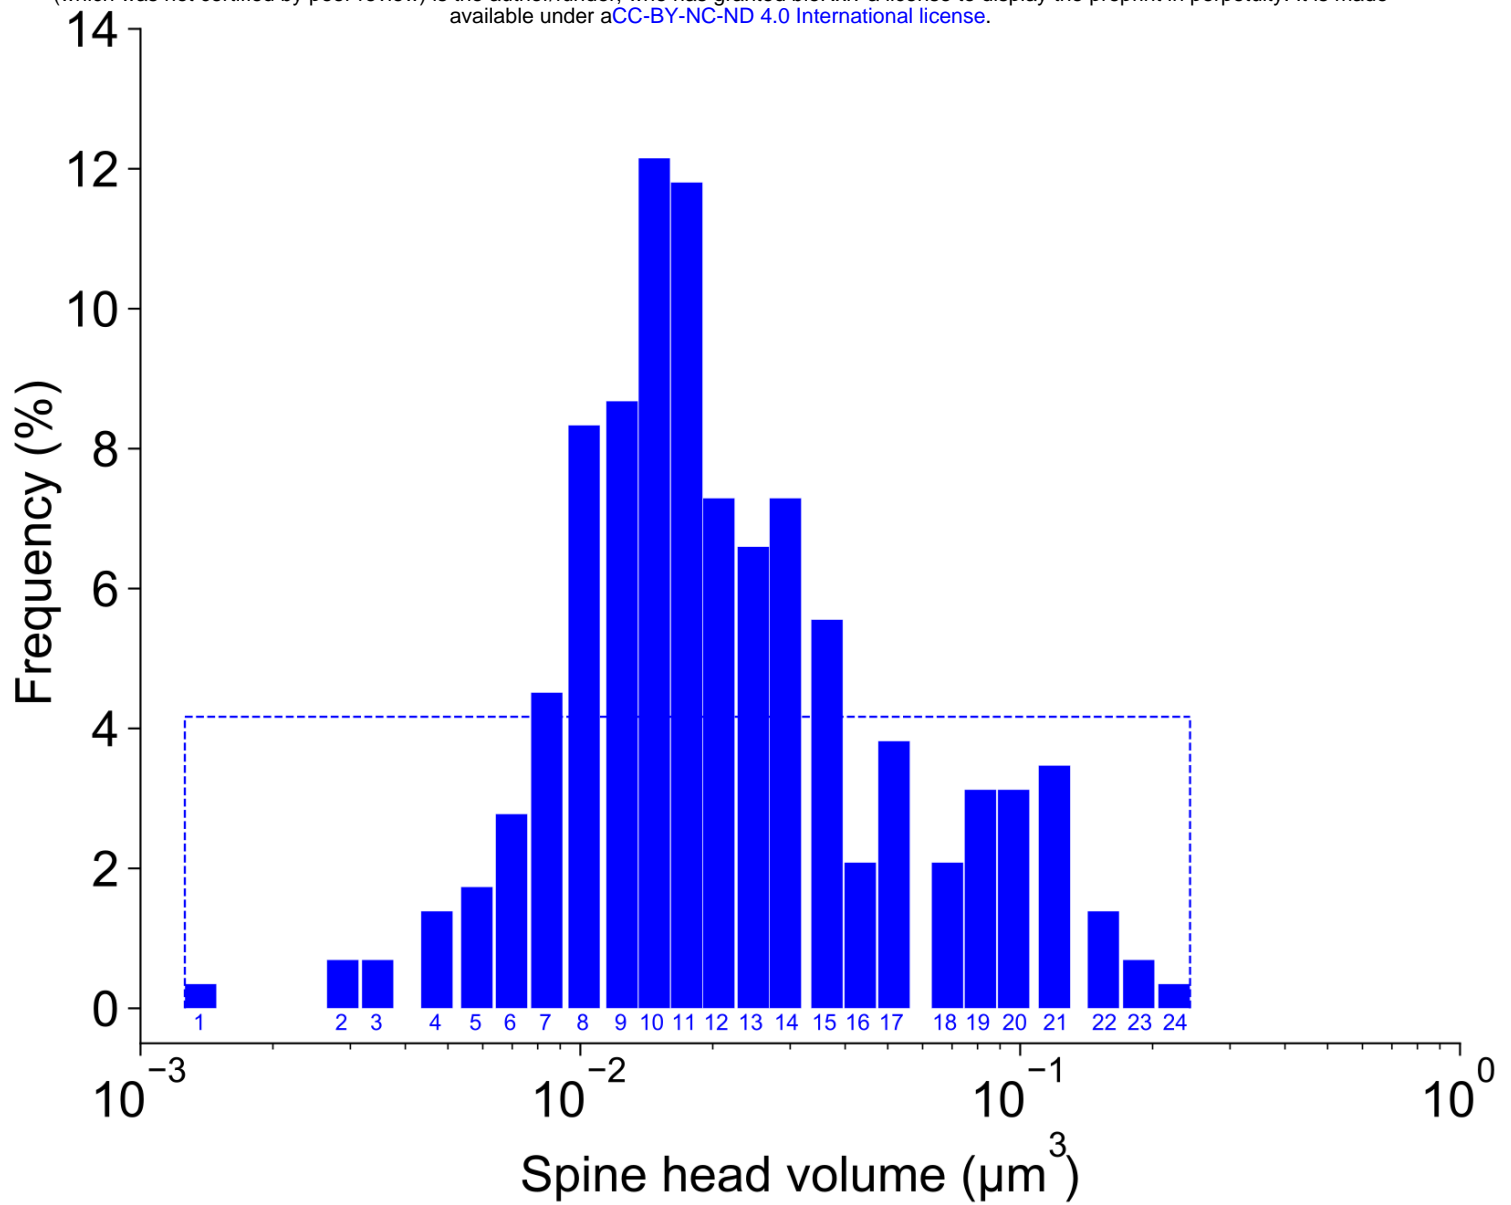

122

123

124

125

#### Supplementary Fig 4.

126

CA1 24 distinguishable clusters.

127

The Y axis indicates the frequency of spine head volumes within each cluster and the X axis indicates the spine head volumes values in the log scale.

128

129

The dash rectangular box around the histogram is the frequency of spine head volumes if the 288 spine head volumes were distributed uniformly among the 24 clusters.

130

## Histogram of Spine Head Volume Categories (DG 30 min Control)

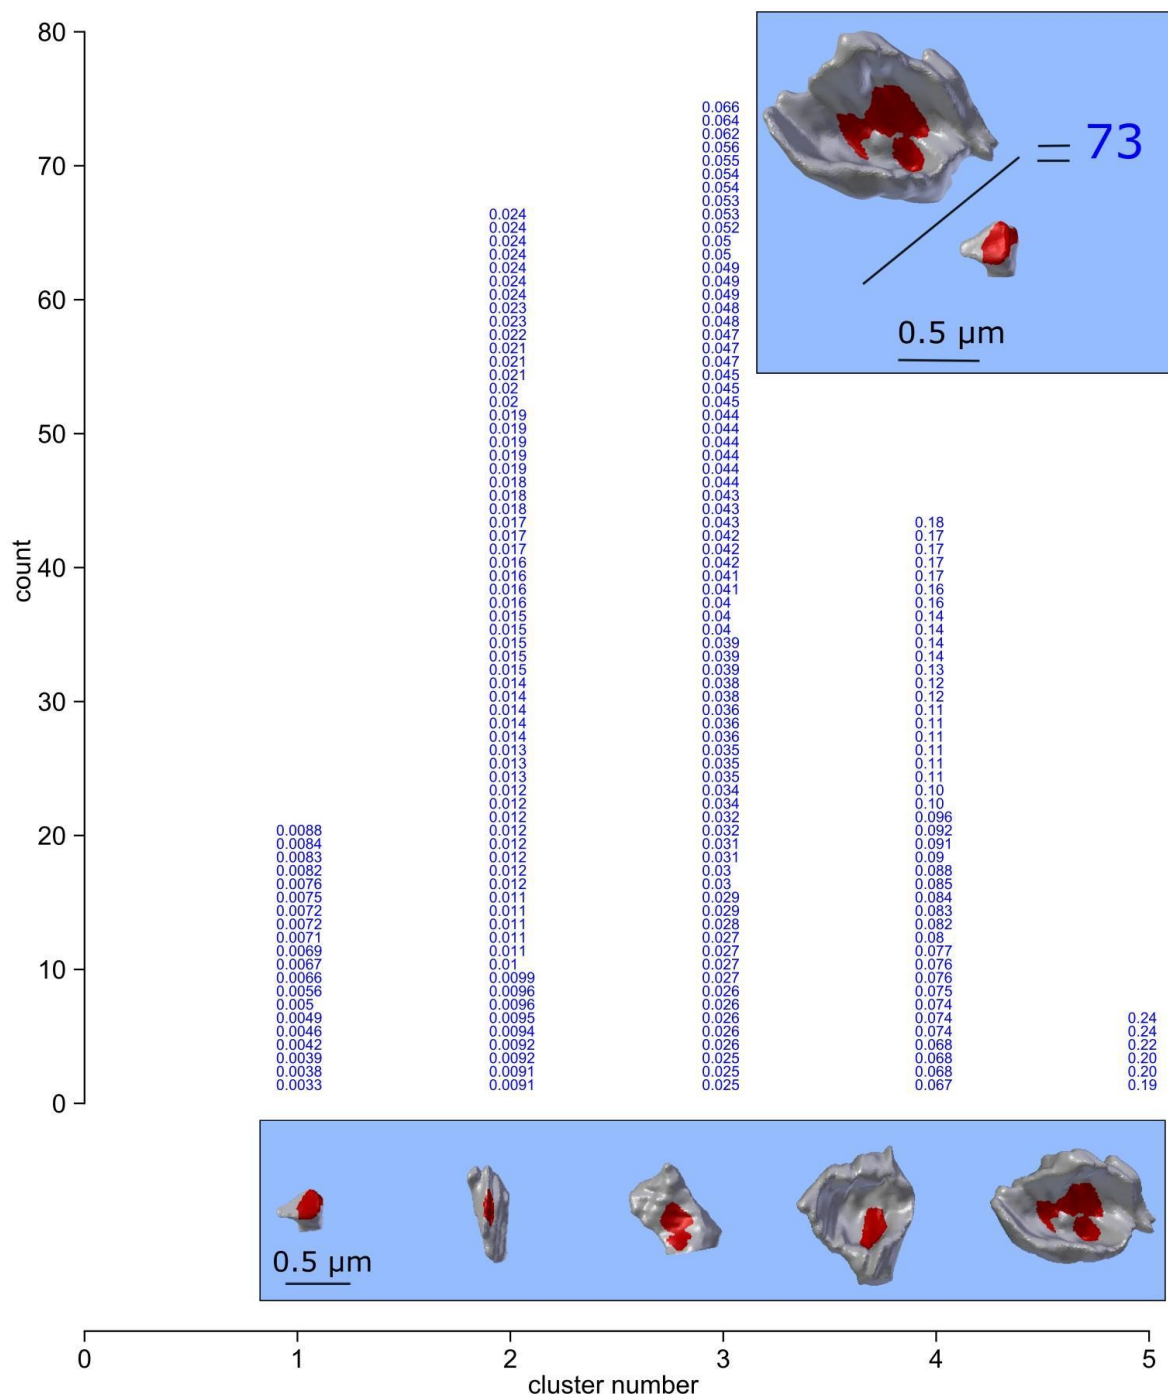

131  
132

### 133 **Supplementary Fig 5.**

134 The clustering of 209 spine head volumes of two rats in control conditions (30 min data). To analyze synapses in the whole  
 135 reconstructed cube, the 209 spine head volumes are clustered into 5 distinguishable categories based on the median value  
 136 CV calculated from 10 SDSA pairs detected in the reconstructed cube. Median value of 10 CVs calculated from analysis  
 137 illustrated in inset in panel B with the value of 0.65. The Y axis shows the number of spine head volumes within each  
 138 category. The 3D object below each category (vertical column) is the actual 3D reconstructed spine head volume of the  
 139 largest head volume in the category. The X axis shows the distinguishable categories number.
